1 Rhizosphere Microbiomes in a Historical  
2 Maize/Soybean Rotation System respond to Host  
3 Species and Nitrogen Fertilization at Genus and  
4 Sub-genus levels

5

6 Michael A. Meier<sup>1,2,\*</sup>, Martha G. Lopez-Guerrero<sup>3</sup>, Ming Guo<sup>1,2</sup>, Marty R. Schmer<sup>4</sup>, Joshua R.  
7 Herr<sup>5</sup>, James C. Schnable<sup>1,2</sup>, James R. Alfano<sup>2,5\*\*</sup> & Jinliang Yang<sup>1,2,\*</sup>

8

9

10 <sup>1</sup>Department of Agronomy and Horticulture, University of Nebraska-Lincoln, Lincoln, NE 68583,  
11 USA.

12 <sup>2</sup>Center for Plant Science Innovation, University of Nebraska-Lincoln, Lincoln, NE 68583, USA.

13 <sup>3</sup>Department of Biochemistry, University of Nebraska-Lincoln, Lincoln, NE 68588, USA

14 <sup>4</sup>USDA-ARS Agroecosystem Management Research Unit, 251 Filley Hall, Lincoln, NE 68583,  
15 USA

16 <sup>5</sup>Department of Plant Pathology, University of Nebraska-Lincoln, Lincoln, NE 68583, USA.

17 \* Corresponding authors

18 \*\* Deceased

19

## 20 Abstract

21 Root associated microbes are key players in plant health, disease resistance, and nitrogen (N)  
22 use efficiency. It remains largely unclear how the interplay of biological and environmental  
23 factors affects rhizobiome dynamics in agricultural systems. Here, we quantified the composition  
24 of rhizosphere and bulk soil microbial communities associated with maize (*Zea mays* L.) and  
25 soybean (*Glycine max* L.) in a long-term crop rotation study under conventional fertilization and  
26 low N regimes. Over two growing seasons, we evaluated the effects of environmental conditions  
27 and several treatment factors on the abundance of rhizosphere and soil colonizing microbial  
28 taxa. Time of sampling, host plant species and N fertilization had major effects on microbiomes,  
29 while no effect of crop rotation was observed. Using variance partitioning as well as 16S  
30 sequence information, we further defined a set of 82 microbial genera and sub-genus groups  
31 that show distinct responses to treatment factors. We identified taxa that are highly specific to  
32 either maize or soybean rhizospheres, as well as taxa that are sensitive to N fertilization in plant  
33 rhizospheres and bulk soil. This study provides insights to harness the full potential of soil  
34 microbes in maize and soybean agricultural systems through plant breeding and field  
35 management.

## 36 Introduction

37 Crop rotations of maize and soybean exploit the symbiotic relationship of legumes with nitrogen  
38 (N) fixing bacteria. This rotation system has historically been a widespread practice in the U.S  
39 and continues to be employed as a supplement to synthetic N fertilizer (Peterson and Varvel,  
40 1989). Soybean-maize (Jagadamma et al., 2008) and other crop rotations in general  
41 (Drinkwater et al., 1998; Peralta et al., 2018) have also shown beneficial effects on crop yield,  
42 disease resistance, weed management and soil nutrient conservation. Root-colonizing soil  
43 microbes may play a role in N use efficiency (Garnett et al., 2009), plant health (Berendsen et  
44 al., 2012) and crop performance (Yadav et al., 2018) in agricultural fields. Furthermore, the  
45 capacity of plants to recruit a specific set of beneficial microbes can potentially be employed in  
46 plant breeding and genetic engineering to improve disease resistance and yield potential of crop  
47 plants while reducing the application of exogenous fertilizer and pesticides (Chaparro et al.,  
48 2012; Compant et al., 2010; Haichar et al., 2008; Huang et al., 2014).

49  
50 Soil and rhizosphere microbial communities have been studied in several major crop species  
51 including maize (Peiffer et al., 2013), soybean (Mendes et al., 2014), wheat (Donn et al., 2015)  
52 and rice (Edwards et al., 2015), as well as in crop rotation systems, including maize-wheat  
53 (Rascovan et al., 2016), wheat-maize-soybean (Gdanetz and Trail, 2017) and more complex  
54 systems (Peralta et al., 2018). Similarly, the effects of N-fertilization on microbial communities  
55 have been studied in maize (Zhu et al., 2016), wheat (Kavamura et al., 2018), and rice (Ikeda et  
56 al., 2014). These studies have shown that crop plant species, N-fertilization, and possibly crop  
57 rotation affect rhizosphere microbial community structure. However, it is largely unknown how  
58 these factors together shape rhizosphere and soil microbial communities in the context of  
59 contemporary farm management practices, and how these factors rank in terms of their impact  
60 on the abundance of distinct rhizosphere and soil colonizing microbial taxa. For instance, it has

61 been unclear whether maize and soybean planted in succession in the same field would adopt  
62 similar root microbiomes in response to soil “memory” induced by the previous year’s crop  
63 (Lapsansky et al., 2016), or if the effect of the host plant would outweigh any crop rotation  
64 effects.

65

66 Here, we leveraged a long-term experimental field with consistent crop rotations (established  
67 1972) and N fertilizer regimes (established 1983) (Peterson and Varvel, 1989; Varvel, 2000) in a  
68 two year replicated experiment. Through 16S sequencing of rhizosphere and bulk soil samples  
69 and statistical modeling of individual amplicon sequence variants (ASVs), we aim to rank the  
70 impact of agriculturally relevant factors, including environmental conditions (year and month of  
71 sampling), biological factors (crop plant species), and agricultural practices (N fertilization and  
72 crop rotation) on the abundance of rhizosphere and bulk soil colonizing microbes. We further  
73 aim to identify microbial taxa that respond to these diverse treatment factors as consistent  
74 units. Among these taxa, we aim to identify the key respondents that are specific to either maize  
75 or soybean, and taxa that respond to inorganic N-fertilization or the lack thereof.

76

77

78

79

80

## 81 **Materials & Methods**

## 82 Experimental design and sample collection

83 Maize and soybean plots in a historic long-term crop rotation study at the Eastern Nebraska  
84 Research Extension Center near Mead, NE (41.167380, -96.418667) were arranged in a  
85 randomized complete block design (Peterson and Varvel, 1989). Detailed site, management,  
86 yield and long-term weather information can be accessed at the USDA-ARS Agricultural  
87 Collaborative Research Outcomes System (AgCROS) website ([https://agcros-  
89 usdaars.opendata.arcgis.com/](https://agcros-<br/>88 usdaars.opendata.arcgis.com/)). For this study, plants were sampled from two replicate blocks in  
90 each of two subsequent years (2017 and 2018). Each replication included four plots planted  
91 with continuous maize (M), continuous soybean (S), maize rotated with soybean (MS), and  
92 soybean rotated with maize (SM). Each plot contained a subplot with standard N treatment (180  
93 kg/ha annually for maize, 68 kg/ha for soybean) and a subplot with low N conditions (no added  
94 N). From each of those subplots (experimental units), two subsamples, each for plant  
95 rhizosphere and bulk soil were collected in June, August, and September (7, 14, and 20 weeks  
96 after planting). In total, 384 samples were collected (2 years x 3 months x 2 plant species x 2  
97 crop rotations x 2 N treatments x 2 soil compartments x 2 blocks x 2 subsamples = 384), see  
98 Fig. 1. This experimental design made it possible to distinguish 5 experimental factors: year of  
99 sampling (year 1 or year 2), month of sampling (early, mid and late season), plant species  
100 (maize or soybean), crop rotation (continuous vs. rotated), and N treatment (standard N  
101 fertilization or low N conditions). All analyses were conducted separately for rhizosphere soil  
102 and bulk soil.

102

103

## 104 16S rRNA sequencing and microbial community analysis

105 Genomic DNA was extracted from n=192 rhizosphere and n=192 bulk soil samples using the  
106 DNeasy PowerSoil kit (Qiagen, Hilden, Germany). Paired-end sequencing of a 300-bp  
107 sequence spanning the V4 region of the ribosomal 16 S rRNA was generated using the Illumina  
108 MiSeq platform (Illumina Inc., San Diego, CA, USA). Overall, sequencing yielded 41.4M raw  
109 16S reads for 384 samples with a median number of 121k reads per sample for rhizosphere and  
110 103k reads per sample for bulk soil samples. ASVs were called using a dada2-based pipeline  
111 as described by (Callahan et al., 2016a, 2016b). After a series of quality and abundance filtering  
112 steps (see Fig. S1), a final set of 4.3M reads were retained that belong to a curated set of 2,225  
113 unique ASVs derived from both rhizosphere and bulk soil samples. The median read count per  
114 sample was 13.1k for rhizosphere and 5.9k for bulk soil samples.

115

## 116 Grouping of ASVs into taxonomic groups

117 ASVs were initially grouped at the genus level. This is the lowest taxonomic level where groups  
118 of operational taxonomic units (OTUs) or amplicon sequence variants (ASVs) can be reliably  
119 annotated using short reads of 16S rDNA alone based on the SILVA reference database  
120 (Yilmaz et al., 2014). Sub-genus groups were further identified based on taxonomic clustering of  
121 each genus' ASVs and associated variance partitioning data. For each of 87 genera, a  
122 phylogenetic tree of all ASVs was plotted together with the variance scores. This procedure  
123 allowed us to identify a total of 105 genera and sub-genus groups that show distinct and  
124 unambiguous responses to treatments. 82 groups that had at least five distinct ASVs were used  
125 for subsequent analyses. For each set of ASVs that mapped to a genus in which subgroups  
126 were identified, open-reference OTU picking was performed in qiime (Caporaso et al., 2010) to  
127 cluster ASVs into OTUs. The number of OTUs generated through this OTU picking procedure

128 was compared to the number of groups identified through manual identification of genus  
129 subgroups (Table S1).

130

## 131 Statistical analysis

132 Variance partitioning was performed on the ASV table with log transformed relative abundances  
133 to estimate the contribution of each treatment factor to changes in microbiome composition in  
134 rhizosphere and bulk soil. For each of 2,225 ASVs present in rhizospheres and a subset of  
135 2,014 ASVs present in bulk soil, the fraction of total variance explained by each treatment factor  
136 was calculated using R package lme4 (Bates et al., 2015) with the model  $\log(\text{ASV relative abundance}) \sim \text{Year} + \text{Month} + \text{Host species} + \text{Crop rotation} + \text{Nitrogen} + \text{Block} + \text{Subsample}$ ,  
137 where year, month, host species, crop rotation, nitrogen, block, and subsample were all fit as  
138 random effects.

140 Differential abundance of taxonomic groups in response to treatments was calculated with R  
141 package DESeq2 (Love et al., 2014): starting from the ASV table with raw sequence counts,  
142 ASVs were agglomerated into 82 taxonomic groups identified above, and a +1 pseudocount  
143 was added to all table values. Unless stated otherwise,  $n = 96$  samples were used for  
144 comparisons, e.g. 96 soybean rhizosphere samples vs. 96 maize rhizosphere samples.

145

146 For a detailed description of experimental procedures and data availability view supplementary  
147 methods.

148

149

## 150 Results

151 Rhizosphere and soil microbiomes in a historical crop rotation system are  
152 highly dynamic over time and across niche environments

153 Because our field experiments are subject to year and seasonal effects (Fig. S2), our first  
154 analysis was to assess how rhizosphere and bulk soil microbiomes vary across early, mid and  
155 late season sampling time points in two consecutive years. Principal coordinates analysis (Fig2  
156 A) revealed the time of sampling to be the largest source of variation (PCoA axis 1, 34%),  
157 followed by soil compartment rhizosphere vs. bulk soil (PCoA axis 2, 20.4%). Time point  
158 variation may be attributable to temperature and precipitation patterns. In particular, the last  
159 sampling time point in 2018 occurred soon after a major precipitation event associated with  
160 drastic changes in microbial community composition (Fig. S2). Rhizosphere and bulk soil  
161 microbiomes are more dissimilar in soybean than in maize with clear separation along axis 2 in  
162 the PCoA plot. In both soil compartments, we observed higher microbial diversity in 2018 than in  
163 2017 as measured by the Shannon diversity index (Fig2 B). In addition, both bulk soil and  
164 rhizosphere microbiomes tended to increase in diversity as the season progresses (Fig2 B).

165 Environment, host plant, and agricultural practice together shape microbial  
166 communities

167 We fit a mixed linear model for each ASV as a response variable in order to reveal in more  
168 detail to what degree microbial communities are influenced by different treatment factors (see  
169 materials and methods). Through variance partitioning, we calculated the proportion of total  
170 variance attributable to each treatment factor (termed “variance scores”) for rhizosphere (2,225  
171 ASVs) and bulk soil (2,014 ASVs). We tallied the number of ASVs that are responsive to



172 treatment – defined here as any ASVs with a variance score above an arbitrary threshold of 5%  
173 – to estimate the relative importance of each treatment factor in shaping microbiome  
174 composition (Fig. 3). For rhizosphere data, out of  $n= 2,225$  ASVs, we found 1,115 (50.1%)  
175 responsive to year and 835 (37.5%) responsive to month above the 5% threshold. For bulk soil  
176 data, out of  $n= 2,014$  ASVs, we found 668 (34.2%) responsive to year and 639 (31.7%)  
177 responsive to month. These results agreed with our previous observations (Fig. 2) and  
178 suggested environmental factors affect microbiome abundance in the rhizosphere more than in  
179 bulk soil.

180  
181 Interestingly, microbial communities responded to host plant species to a statistically significant  
182 higher degree in the rhizosphere than the bulk soil (Chi-squared test,  $p\text{-value} = 2.2e\text{-}16$ ), with  
183 variance scores of 618 ASVs in rhizosphere and only 88 ASVs in bulk soil exceeding 5%.  
184 Employing a threshold of 10% reveals a similar pattern with 422 ASVs in the rhizosphere and 9  
185 ASVs in bulk soil exceeding the threshold (Chi-square  $p\text{-value} = 2.2e\text{-}16$ ), and patterns were  
186 overall consistent at thresholds of 2.5% or 10% (Fig. S3). For 36 ASVs in the rhizosphere, more  
187 than 40% of total variance was explained by host plant species whereas no response was  
188 observed in bulk soil. These results are consistent with the idea that rhizosphere ecosystems  
189 are home to highly specialised microbes that have co-evolved alongside plant hosts, whereas  
190 bulk soil harbors more uniform microbial communities.

191  
192 Among factors related to agricultural practice, we found that 5% or more variability was  
193 explained by N treatment in 539 rhizosphere ASVs and in 300 bulk soil ASVs (Chi-square  $p\text{-value} = 3.6e\text{-}14$ ), with scores exceeding 20% for 71 and 42 ASVs (Chi-square  $p\text{-value} = 0.03267$ ), respectively. In contrast, response to crop rotation was negligible in both rhizosphere  
195 and bulk soil, suggesting that the previous year's crop has at best a minor effect on microbial  
196

197 community composition in any given year. We detected no noticeable variation due to  
198 experimental blocks and subsamples.

199

## 200 Response to host species and N treatment reveals groups of microbial taxa 201 at sub-genus level

202 As responses to host plant species and N treatment were apparent at the level of individual  
203 ASVs, we hypothesized that the responsive ASVs might be clustered into taxonomic groups. In  
204 order to address this hypothesis, we binned ASVs into 87 distinct microbial genera based on  
205 SILVA taxonomy annotation. However, by plotting all ASVs within each genus against the  
206 variance scores in response to plant host species and N treatment, we noticed a high range of  
207 values in some cases (Fig. S4), suggesting that there may be distinct groups of ASVs within the  
208 same genus that show different responses to treatments.

209 To achieve taxonomic resolution beyond the genus level, we constructed a phylogenetic tree of  
210 all ASVs in each genus together with the variance scores in response to host plant species and  
211 N treatment in the rhizosphere (see materials and methods). Using this approach, we identified  
212 subgroups in 12 genera: *Streptomyces*, *Chitinophaga*, *Flavobacterium*, *Pedobacter*,  
213 *Mucilaginibacter*, *Burkholderia*, *Pseudomonas*, *Sphingomonas*, *Sphingobium*, *Mesorhizobium*,  
214 *Nitrobacter*, and *RB41* with distinct patterns of variance partitioning (Supplementary file 1). For  
215 example, the genus *Burkholderia* (Fig. 4A & 4B), shows two clusters of ASVs (*Burkholderia\_S1*,  
216  $n= 29$  ASVs and *Burkholderia\_S2*,  $n= 28$  ASVs) that exhibited significantly different variance  
217 scores (Wilcoxon rank sum test  $p$ -value =  $2.2e-16$ ). These clusters are further grouped by  
218 phylogeny, which may indicate separate evolutionary lineages. We refer to these groups as sub-  
219 genus groups in this study to draw a distinction between groups identified here by 16S  
220 phylogeny and variance partitioning, and microbial “species” that are categorized in some 16S

221 sequence databases other than SILVA based on sequencing information alone. In total, a final  
222 set of 82 taxonomic groups (genera and sub-genus groups) was defined that responded to  
223 treatments as a unit. These groups spanned 64 genera and 12 classes of prokaryotes and  
224 contained between 5 and 102 ASVs, displayed in a phylogenetic tree (Fig. 4C) generated based  
225 on 300 bp 16S sequences and rooted using the outgroup *Candidatus\_Nitrocosmicus* (Archaea).  
226 This set of 82 taxa was used for subsequent analyses in this study. Total abundances of each  
227 group were estimated by the sum of read counts across all samples (Fig. S5).  
228 To evaluate how our ASV grouping method compares to automated OTU clustering, OTU  
229 picking was performed on the sets of ASVs within each of the 12 genera for which we identified  
230 sub-genus groups (see materials and methods). The number of sub-genus groups generated by  
231 classical OTU picking at a fixed 97% sequence identity threshold was in many cases larger than  
232 the number of subgroups identified using our method, which may indicate some redundancy  
233 (Table S1). In other cases (including *Burkholderia* in Fig. 4A & 4B), OTU picking failed to identify  
234 sub-genus groups altogether, even though variance partitioning data shows a clear distinction in  
235 the behavior of groups of ASVs.

236

237 Host plants strongly affect rhizosphere microbial communities and have  
238 little influence over bulk soil

239 Fig. 5 shows 26 taxa that are responsive to host plant species in the rhizosphere, using a 5%  
240 variance score as a cutoff. The variance scores are reported together with the Log2 Fold  
241 Change (Log2FC) differential abundance of ASV counts in n = 96 soybean vs n = 96 maize  
242 rhizosphere samples, and ranked by the response to host plant species. In contrast, no  
243 taxonomic groups responded to plant species above the 5% threshold in bulk soil, with the  
244 exception of *Rudaea* (see Fig. S6 for complete data).

245

246 Maize and soybean recruit distinct and highly specialized microbial taxa to  
247 rhizospheres

248 Several rhizosphere-dwelling taxa showed a strong response to host plant species. 9 out of the  
249 top 10 taxa responding to host plant species are specific to soybean (Fig. 5). These include  
250 *Bradyrhizobium*, *Rhizobium*, *Nordella*, *Nitrobacter*, *Novosphingobium*, *Phenylobacterium*,  
251 *Streptomyces\_S1*, *Allostreptomyces*, and *Chitinophaga\_S2*. Among the three members of the  
252 *Sphingomonadaceae* family, *Novosphingobium* (Log2FC = 5.98, FDR adjusted p-value =  
253 1.44e-105) was highly specific to soybean, whereas *Sphingobium\_S1* (Log2FC = -6.88 FDR =  
254 1.67e-93), *Sphingobium\_S2* (Log2FC = -6.12, FDR = 1.02e-83) and *Sphingomonas\_S1*  
255 (Log2FC = -5.03, FDR = 6.97e-32) were specific to maize. *Sphingomonas\_S2* (Log2FC = -0.77,  
256 FDR = 0.0107) shows no substantial host preference. Similarly, within the *Streptomyces* genus,  
257 *Streptomyces\_S3* (Log2FC = 4.81, FDR = 7.82e-63) was highly specific to soybean whereas  
258 *Streptomyces\_S2* (Log2FC = -2.00, FDR = 1.94e-07) showed a preference for maize, and  
259 *Streptomyces\_S1* (Log2FC = -0.15, FDR = 0.5928) was found in roughly equal proportions in  
260 soybean and maize. *Burkholderia\_S1* (Log2FC = -5.63, FDR = 2.50e-43) was highly specific to  
261 maize whereas *Burkholderia\_S2* (Log2FC = 0.01 FDR = 0.9786) appears to have no preference  
262 (compare also with Fig. 4B).

263 Nitrogen treatment affects soil and rhizosphere microbiomes directly and  
264 indirectly via host plant effects

265 Fig. 6 shows microbial taxa that respond to N treatment at a threshold of >5% variance  
266 explained. We hypothesized that the N treatment would affect rhizosphere microbiomes of  
267 maize and soybean differently, hence differential abundances of microbial taxa were analyzed

268 separately for n=48 low N vs n=48 std N maize rhizosphere samples and for n=48 low N vs  
269 n=48 std N soybean rhizosphere samples(Fig 6A). For comparison, differential abundance of  
270 microbes between maize and soybean was shown as before (Fig 6A, rightmost panel). For bulk  
271 soil, comparisons of n=96 low N vs n=96 std N samples were made with samples from both  
272 maize and soybean fields (Fig 6B). The complete data is shown in (Fig. S7). Overall, more taxa  
273 were responsive in rhizosphere samples (n=20) than in bulk soil (n=8) at a threshold of >5%  
274 variance explained by N treatment. Notably, several taxa responded to N treatment both in bulk  
275 soil and in rhizospheres: *Nitrospira*, *Sphingomonas\_S1* & *Sphingomonas\_S2*, *Rudaea*,  
276 *Nocardioides*, and *UTBCD1* (marked bold in Fig. 6). Among these taxa, *UTBCD1* increased  
277 under low N whereas the other groups increased under std N in both bulk soil and rhizospheres.  
278 Two subgroups of genus *RB41*, *RB41\_S1* and *RB41\_S2*, were responsive to N treatment  
279 exclusively in bulk soil, whereas *RB41\_S3* was responsive in both rhizospheres. *RB41\_S1* and  
280 *RB41\_S2* increased under std N whereas *RB41\_S3* was highly increased under low N.  
281 Groups that mainly respond to N treatment in both rhizospheres include *Burkholderia\_S1* &  
282 *Burkholderia\_S2*, *Mucilaginibacter\_S1*, *Mesorhizobium\_S1*, *Massilia*, *Streptomyces\_S2*,  
283 *Pseudomonas\_S2* & *Pseudomonas\_S4*, *RB41\_S3*, *Phenylobacterium*, *Sphingobium\_S1*,  
284 *Gemmatimonas*, *Terrimonas* and *Gaiella*.  
285 These data suggest that N fertilization has a direct effect on the 6 microbial taxa that respond in  
286 both rhizosphere and bulk soil environments, as well as an indirect effect on taxa that only  
287 respond in rhizospheres, which is likely induced by changes in the host plant rhizosphere.

288

## 289 Maize rhizosphere microbiomes are affected by N-deficiency

290

291 Differential abundance of microbial groups tends to be more extreme in maize than in soybean.  
292 This was noticed by calculating the means of absolute Log2 Fold Changes (low N ASV counts

293 vs std N ASV counts) for maize and soybean in rhizospheres (maize mean Log2FC 1.945735 vs  
294 soybean mean Log2FC 0.9755595, Welch two sample t-test p-value 1.54e-05) as well as in bulk  
295 soil (maize mean Log2FC 1.51321 vs soybean mean Log2FC 0.8643147, p-value 0.001722).  
296 The vast majority of taxa responding to N treatment occur in greater numbers in maize than in  
297 soybean rhizospheres (Fig 6A, rightmost panel). While responses to N treatments are generally  
298 more pronounced in maize rhizospheres than in soybean rhizospheres, the direction of the  
299 changes seems to be consistent between host plant species, with a few notable exceptions:  
300 *Rudaea* are more abundant under standard N treatment than under low N in maize  
301 rhizospheres (and in bulk soil), whereas no response to N treatment was observed in soybean  
302 rhizospheres. Similarly, *Pseudomonas\_S4* and *Pseudomonas\_S2* increase in abundance under  
303 low N in maize rhizospheres but not in soybean rhizospheres.  
304 Maize showed a severe N-deficiency phenotype, especially late in the season. This is known to  
305 dramatically change root architecture and exudation patterns (Gaudin et al., 2011). In contrast,  
306 soybean plants are more tolerant to a wide range of N fertilizer, which is reflected in a more  
307 stable root microbiome. Together, these data show that variation in N levels likely has a direct  
308 effect on soil microbes as well as an indirect effect through the impact of N levels on plant  
309 health and root exudation, which is most apparent in maize.

310

311

312

## 313 Discussion

314 Environmental factors, plant species and N treatments affect rhizosphere  
315 microbiota

316 Through statistical modeling of individual ASVs and variance partitioning we identified three  
317 major factors influencing rhizosphere microbial communities: time of sampling, plant species  
318 and N treatment. Year-to-year variation due to different weather conditions is common in  
319 agricultural experiments, and soil microbial communities are known to be affected by changes in  
320 temperature or humidity (Ullah et al., 2019; van der Voort et al., 2016, Fig. S2). Seasonal  
321 variation has an additional biological cause as host plant physiology – including root exudation –  
322 changes significantly as plants mature (Shi et al., 2015). Apart from environmental factors, the  
323 host plant species is the most important factor shaping rhizosphere microbiomes. Genetic  
324 distance between plant species (Fitzpatrick et al., 2018) and between genotypes of the same  
325 species (Bouffaud et al., 2014) seems to correlate with differences in microbial communities. N  
326 fertilization had an effect on both rhizosphere and soil microbial communities, which has been  
327 observed before in maize (Zhu et al., 2016). Our data show that both host plant genetics and N  
328 fertilization are major factors influencing microbial communities in maize/soybean agricultural  
329 systems. It may thus be possible to modify the composition of microbial communities in the field  
330 through plant breeding and the mode of fertilizer application, respectively.

331 Our data do not support a major effect of crop rotation on bulk soil or rhizosphere microbiomes  
332 when compared to other environmental and experimental factors. Thus more targeted  
333 experiments are required to discern any changes in bulk soil and rhizosphere microbiomes in  
334 response to different cropping histories at agricultural field sites.

335

## 336 ASVs and variance data enable unprecedented taxonomic resolution

337 A common practice in observational microbiome studies is to cluster 16S amplicon sequences  
338 into operational taxonomic units (OTUs) in bins of 97% sequence similarity, and conclusions  
339 about microbial communities are drawn often at the level of bacterial phyla or classes (Bragina  
340 et al., 2015), and rarely at lower taxonomic ranks such as families (Santos-Medellín et al.,  
341 2017). However, in a highly competitive environment such as the plant rhizosphere we would  
342 expect to find highly specialized groups of microbes that react differently to a variety of  
343 treatments and any such effects would not be apparent at higher taxonomic ranks. Moreover,  
344 OTUs may not correspond to any established taxonomic rank or experimentally distinguishable  
345 group of microbes that can be studied as a unit (Yilmaz et al., 2014).

346 To circumvent the problems inherent to OTU clustering, we employed variance partitioning on  
347 individual amplicon sequence variants (ASVs) and used these data to complement DNA  
348 sequence information. This novel approach allowed us to identify biologically relevant taxonomic  
349 groups at the genus and sub-genus level. Importantly, we showed that traditional OTU picking  
350 would have under- or overestimated the number of sub-genus groups in most cases (Table S1).  
351 Most interestingly, the two subgroups of *Burkholderia* identified in this study, which show  
352 significantly different responses to host plant species (Fig. 4A & 4B), would have been missed  
353 entirely with traditional OTU picking. Thus, we demonstrated that multifactorial experimental  
354 designs may be exploited to improve taxonomic resolution in microbiome studies using both  
355 16S sequence information and variance partitioning data. It may be worthwhile to formalize and  
356 automate this process using appropriate statistical tools or machine learning approaches, and to  
357 re-analyze previously published data sets whenever there are treatment factors involved that  
358 could be used to distinguish groups of microbes.

359



360 Host plant species are a key predictor of rhizosphere microbial  
361 communities

362 Overall, higher microbial diversity was observed in rhizospheres than in bulk soil, which is  
363 consistent with previous studies (Prashar et al., 2014). Also in accordance with previous  
364 research (Wang et al., 2017), we observed strong responses to host plant species in both maize  
365 and soybean rhizospheres and no response in bulk soil sampled only a few centimeters away  
366 from root surfaces. An immediate effect of host plants on bulk soil microbiomes is not expected  
367 as root exudate concentrations decline exponentially and reach virtually zero only 7 mm into the  
368 soil (Kuzyakov et al., 2003).

369 The top 6 taxa responding to plant host species are specific to soybean. Unsurprisingly, they  
370 include N fixing bacteria such as *Bradyrhizobium*, *Rhizobium* and closely related *Nordella*.  
371 These were previously identified as key components of soybean microbiomes (Sugiyama et al.,  
372 2014). Nitrobacter is closely related to Bradyrhizobium and involved in Nitrite oxidation (Boon  
373 and Laudelout, 1962). *Novosphingobium*, *Phenylobacterium*, *Streptomyces* and  
374 *Allostreptomyces* have no known role in the N cycle. One notable observation was that  
375 *Novosphingobium* is highly specific to soybean, and *Sphingobium* and *Sphingomonas* are  
376 specific to maize, while all three genera are members of the *Sphingomonadaceae* family. This  
377 demonstrates once again the need for adequate taxonomic resolution when comparing  
378 microbial communities.

379 *Novosphingobium* has been found in the rhizosphere of *Arabidopsis* (Lin et al., 2014), maize  
380 (Kampfer et al., 2015), lettuce (Schreiter et al., 2014) and rice (Zhang et al., 2016), and to our  
381 knowledge it has not previously been reported as a prominent member of soybean  
382 rhizospheres. It remains to be confirmed whether *Novosphingobium* can be found in soybean  
383 rhizospheres in different geographic locations and in different soybean cultivars. *Sphingomonas*  
384 has been isolated previously from maize rhizospheres and proposed as a good candidate for

385 microbial fertilizers due to N-fixation capabilities (Sun et al., 2010). A previous study (Li et al.,  
386 2014) has found *Sphingobium* to be significantly enriched in the maize rhizosphere compared to  
387 bulk soil, which was consistent with our findings. *Sphingobium* has also been found in  
388 rhizospheres of other grasses such as sorghum (Kochar and Singh, 2016) and common reed  
389 (Toyama et al., 2009), as well as in distantly related plants such as pine trees (Lee et al., 2019)  
390 and Kumquat (Young et al., 2008). Members of the *Sphingobium* genus were shown to degrade  
391 phenolic compounds such as the biocide pentachlorophenol (Dams et al., 2007) and to  
392 solubilize inorganic phosphates (Yongbin Li et al., 2017). Furthermore, An aryloxyalkanoate  
393 dioxygenase gene derived from *Sphingobium herbicidivorans* has been successfully expressed  
394 in maize to confer resistance to a broad range of herbicides (Wright et al., 2010).

395

396 Together, our results show that the host plant strongly influences microbial communities in the  
397 rhizosphere, with minimal effect on bulk soil, and that specific taxonomic groups at the genus  
398 and sub-genus level are highly adapted to either host plant. These data are consistent with the  
399 idea that maize and soybean rhizospheres are colonized by highly specialized groups of  
400 microbes that are likely in a symbiotic relationship with the host plant and may be relevant to  
401 plant health and performance.

402

403

404 N treatment affects rhizosphere microbiomes both directly and indirectly via  
405 host plant effects

406 The vast majority of taxa responding to N fertilizer are more abundant in maize rhizospheres  
407 than in soybean rhizospheres, whereas soybean-specific taxa generally do not respond to N  
408 treatments (see Fig. 6A, rightmost panel and Fig. S6). This may be because maize shows a

409 severely stressed phenotype under N-deficiency, especially late in the season, which induces  
410 large-scale changes to root architecture, including root hair length and density (Gaudin et al.,  
411 2011). N-limited conditions have also been shown to alter plant root exudate profiles (Baudoin  
412 et al., 2003; Haase et al., 2007). In contrast, soybean plants are hardly affected if fields are not  
413 fertilized. Thus, two factors shape microbial communities in agricultural systems: direct  
414 application of N fertilizer to the soil, which should affect both rhizosphere and bulk soil microbes,  
415 and changes due to altered root architecture and exudation patterns in response to N  
416 deficiency, which should mainly affect rhizosphere microbiomes. In accordance with this, we  
417 found more taxa affected by N treatment in rhizospheres than in bulk soil. Microbial taxa directly  
418 affected by N treatment are likely the ones that show a response to N treatment in both  
419 rhizosphere and bulk soil samples (marked in bold in Fig 6). All other taxa are likely affected  
420 indirectly, and reduced abundance under N deficiency may be due to reduced vigor of the host  
421 plant rather than due to a simple lack of inorganic N to consume.

422 These findings also support the idea that plant rhizospheres are colonized by highly specialized  
423 groups of microbes that are intimately tied to the host.

424

425 Taxa that increase in abundance under standard N fertilization are often capable of directly  
426 metabolizing ammonia or nitrate. *Rudaea*, a member of the *Xanthomonadaceae* family, has not  
427 been reported in maize or soybean rhizospheres but has been linked to nitrification in  
428 wastewater (Dong et al., 2016). Similarly, *Gemmatimonas*, *Nitrospira*, *Mesorhizobium*,  
429 *Burkholderia*, *Rudaea*, and *RB41* were shown to be key players in N assimilation (Morrissey et  
430 al., 2018). *Burkholderia* and *Sphingomonas* decrease in abundance under low N conditions in  
431 both maize and soybean rhizospheres, even though many members of the genus have N-fixing  
432 capabilities (Caballero-Mellado et al., 2007; Sun et al., 2010). This may indicate that the  
433 reduced abundance could also be due to changes in the rhizosphere environment other than a

434 direct lack of N. This reinforces the idea that rhizosphere microbiomes are primarily shaped by  
435 host plant effects and to a lesser degree by external treatments such as N fertilization.

436

437 Taxa that increase in abundance under low N conditions in plant rhizospheres may be able to  
438 take advantage of reduced plant vigor under N-deficiency. Conversely, we suggest that some  
439 microbes may also be actively recruited by plants if they confer a growth or disease resistance  
440 benefit under low N stress conditions. The *Pseudomonas* genus contains both opportunistic  
441 pathogens and strains with plant-growth promoting activity (Santoyo et al., 2012) and some  
442 groups have previously been observed in maize rhizospheres under low N conditions.  
443 *Terrimonas*, *Gaiella* and *Gemmatimonas* have been observed in maize rhizospheres before  
444 (Correa-Galeote et al., 2016), although their function is unknown. *UTBCD1* (*Chitinophagaceae*)  
445 and *RB41\_S3* (*Pyromonadaceae*), both uncultured bacteria, increased the most under low N  
446 conditions (Liljeroth et al., 1990). Overall, surprisingly little is known about these taxa that  
447 respond positively to N-deficiency in rhizospheres and it remains to be determined whether they  
448 are simple opportunists, whether they cause disease, or whether they actively respond to  
449 changes in root exudate profiles under low N conditions, and if so, whether they have plant-  
450 growth promoting capabilities that could be exploited to improve agricultural production.

451

## 452 Conclusions

453 In this study, we observed that rhizosphere and bulk soil microbiomes are primarily shaped by  
454 seasonal effects due to environmental changes, host plant species, and N treatment, whereas  
455 crop rotation of maize and soybean seems to be of minor importance. This suggests that maize  
456 and soybean rhizosphere microbiomes can potentially be manipulated through targeted plant  
457 breeding and farm management. We defined a set of 82 taxonomic groups at the genus and  
458 sub-genus level based on both 16S sequence information and responses to treatment variables.

459 This allowed us to identify biologically meaningful groups of microbes that are relevant in maize  
460 and soybean production. We found groups of microbes that are highly adapted to either the  
461 maize (e.g. *Sphingobium*) or the soybean host (e.g. *Novosphingobium*), which may be relevant  
462 to plant health and performance. Lastly, we showed that N fertilization or the lack thereof has a  
463 direct effect on the abundance of several groups of microbes in bulk soil and rhizospheres as  
464 well as an indirect effect via reduced host plant vigor that is most apparent in maize. The  
465 findings presented in this work enhance our understanding of the key factors that influence  
466 rhizobiome compositions in two major crop plants under conventional and N-limited farming  
467 practices. Further research in this direction may open avenues to sustainably improve crop  
468 performance in agricultural industry.

469

## 470 References

- 471 Bates, D., Mächler, M., Bolker, B., and Walker, S. (2015). Fitting Linear Mixed-Effects Models  
472 Using lme4. *J. Stat. Softw.* 67.
- 473 Berendsen, R.L., Pieterse, C.M.J., and Bakker, P.A.H.M. (2012). The rhizosphere microbiome  
474 and plant health. *Trends Plant Sci.* 17, 478–486.
- 475 Bouffaud, M.-L., Poirier, M.-A., Muller, D., and Moënne-Loccoz, Y. (2014). Root microbiome  
476 relates to plant host evolution in maize and other Poaceae: Poaceae evolution and root  
477 bacteria. *Environ. Microbiol.* 16, 2804–2814.
- 478 Bragina, A., Berg, C., and Berg, G. (2015). The core microbiome bonds the Alpine bog  
479 vegetation to a transkingdom metacommunity. *Mol. Ecol.* 24, 4795–4807.
- 480 Callahan, B.J., Sankaran, K., Fukuyama, J.A., McMurdie, P.J., and Holmes, S.P. (2016a).  
481 Bioconductor Workflow for Microbiome Data Analysis: from raw reads to community analyses.  
482 *F1000Research* 5, 1492.
- 483 Callahan, B.J., McMurdie, P.J., Rosen, M.J., Han, A.W., Johnson, A.J.A., and Holmes, S.P.  
484 (2016b). DADA2: High-resolution sample inference from Illumina amplicon data. *Nat. Methods*  
485 13, 581–583.
- 486 Chaparro, J.M., Sheflin, A.M., Manter, D.K., and Vivanco, J.M. (2012). Manipulating the soil  
487 microbiome to increase soil health and plant fertility. *Biol. Fertil. Soils* 48, 489–499.
- 488 Compant, S., Clément, C., and Sessitsch, A. (2010). Plant growth-promoting bacteria in the  
489 rhizo- and endosphere of plants: Their role, colonization, mechanisms involved and prospects  
490 for utilization. *Soil Biol. Biochem.* 42, 669–678.
- 491 Dams, R.I., Paton, G.I., and Killham, K. (2007). Rhizoremediation of pentachlorophenol by  
492 *Sphingobium chlorophenicum* ATCC 39723. *Chemosphere* 68, 864–870.
- 493 Donn, S., Kirkegaard, J.A., Perera, G., Richardson, A.E., and Watt, M. (2015). Evolution of  
494 bacterial communities in the wheat crop rhizosphere: Rhizosphere bacteria in field-grown

495 intensive wheat crops. *Environ. Microbiol.* *17*, 610–621.

496 Drinkwater, L.E., Wagoner, P., and Sarrantonio, M. (1998). Legume-based cropping systems  
497 have reduced carbon and nitrogen losses. *Nature* 262–265.

498 Edwards, J., Johnson, C., Santos-Medellín, C., Lurie, E., Podishetty, N.K., Bhatnagar, S., Eisen,  
499 J.A., and Sundaresan, V. (2015). Structure, variation, and assembly of the root-associated  
500 microbiomes of rice. *Proc. Natl. Acad. Sci.* *112*, E911–E920.

501 Fitzpatrick, C.R., Copeland, J., Wang, P.W., Guttman, D.S., Kotanen, P.M., and Johnson,  
502 M.T.J. (2018). Assembly and ecological function of the root microbiome across angiosperm  
503 plant species. *Proc. Natl. Acad. Sci.* *115*, E1157–E1165.

504 Garnett, T., Conn, V., and Kaiser, B.N. (2009). Root based approaches to improving nitrogen  
505 use efficiency in plants. *Plant Cell Environ.* *32*, 1272–1283.

506 Gaudin, A.C.M., Mcclymont, S.A., Holmes, B.M., Lyons, E., and Raizada, M.N. (2011). Novel  
507 temporal, fine-scale and growth variation phenotypes in roots of adult-stage maize (*Zea mays*  
508 L.) in response to low nitrogen stress: Nitrogen stress on maize roots. *Plant Cell Environ.* *34*,  
509 2122–2137.

510 Gdanetz, K., and Trail, F. (2017). The Wheat Microbiome Under Four Management Strategies,  
511 and Potential for Endophytes in Disease Protection. *Phytobiomes J.* *1*, 158–168.

512 Haichar, F. el Z., Marol, C., Berge, O., Rangel-Castro, J.I., Prosser, J.I., Balesdent, J., Heulin,  
513 T., and Achouak, W. (2008). Plant host habitat and root exudates shape soil bacterial  
514 community structure. *ISME J.* *2*, 1221–1230.

515 Huang, X.-F., Chaparro, J.M., Reardon, K.F., Zhang, R., Shen, Q., and Vivanco, J.M. (2014).  
516 Rhizosphere interactions: root exudates, microbes, and microbial communities. *Botany* *92*, 267–  
517 275.

518 Ikeda, S., Sasaki, K., Okubo, T., Yamashita, A., Terasawa, K., Bao, Z., Liu, D., Watanabe, T.,  
519 Murase, J., Asakawa, S., et al. (2014). Low Nitrogen Fertilization Adapts Rice Root Microbiome  
520 to Low Nutrient Environment by Changing Biogeochemical Functions. *Microbes Environ.* *29*,

521 50–59.

522 Jagadamma, S., Lal, R., Hoefl, R.G., Nafziger, E.D., and Adee, E.A. (2008). Nitrogen  
523 fertilization and cropping system impacts on soil properties and their relationship to crop yield in  
524 the central Corn Belt, USA. *Soil Tillage Res.* 98, 120–129.

525 Kavamura, V.N., Hayat, R., Clark, I.M., Rossmann, M., Mendes, R., Hirsch, P.R., and  
526 Mauchline, T.H. (2018). Inorganic Nitrogen Application Affects Both Taxonomical and Predicted  
527 Functional Structure of Wheat Rhizosphere Bacterial Communities. *Front. Microbiol.* 9, 1074.

528 Kuzyakov, Y., Raskatov, A., and Kaupenjohann, M. (2003). Turnover and distribution of root  
529 exudates of *Zea mays*. *Plant Soil* 254, 317–327.

530 Li, X., Rui, J., Mao, Y., Yannarell, A., and Mackie, R. (2014). Dynamics of the bacterial  
531 community structure in the rhizosphere of a maize cultivar. *Soil Biol. Biochem.* 68, 392–401.

532 Love, M.I., Huber, W., and Anders, S. (2014). Moderated estimation of fold change and  
533 dispersion for RNA-seq data with DESeq2. *Genome Biol.* 15, 550.

534 Mendes, L.W., Kuramae, E.E., Navarrete, A.A., van Veen, J.A., and Tsai, S.M. (2014).  
535 Taxonomical and functional microbial community selection in soybean rhizosphere. *ISME J.* 8,  
536 1577–1587.

537 Peiffer, J.A., Spor, A., Koren, O., Jin, Z., Tringe, S.G., Dangl, J.L., Buckler, E.S., and Ley, R.E.  
538 (2013). Diversity and heritability of the maize rhizosphere microbiome under field conditions.  
539 *Proc. Natl. Acad. Sci.* 110, 6548–6553.

540 Peralta, A.L., Sun, Y., McDaniel, M.D., and Lennon, J.T. (2018). Crop rotational diversity  
541 increases disease suppressive capacity of soil microbiomes. *Ecosphere* 9, e02235.

542 Peterson, T.A., and Varvel, G.E. (1989). Crop Yield as Affected by Rotation and Nitrogen Rate.  
543 I. Soybean. *Agron. J.* 81, 727.

544 Prashar, P., Kapoor, N., and Sachdeva, S. (2014). Rhizosphere: its structure, bacterial diversity  
545 and significance. *Rev. Environ. Sci. Biotechnol.* 13, 63–77.

546 Rascovan, N., Carbonetto, B., Perrig, D., Díaz, M., Canciani, W., Abalo, M., Alloati, J.,



547 González-Anta, G., and Vazquez, M.P. (2016). Integrated analysis of root microbiomes of  
548 soybean and wheat from agricultural fields. *Sci. Rep.* 6, 28084.

549 Santos-Medellín, C., Edwards, J., Liechty, Z., Nguyen, B., and Sundaresan, V. (2017). Drought  
550 Stress Results in a Compartment-Specific Restructuring of the Rice Root-Associated  
551 Microbiomes. *MBio* 8, e00764-17.

552 Sun, J.-G., Zhang, Y.-C., Xu, J., and Hu, H.-Y. (2010). Isolation, identification and inoculation  
553 effect of nitrogen-fixing bacteria *Sphingomonas* GD542 from maize rhizosphere:  
554 Isolation, identification and inoculation effect of nitrogen-fixing bacteria *Sphingomonas*  
555 GD542 from maize rhizosphere. *Chin. J. Eco-Agric.* 18, 89–93.

556 Varvel, G.E. (2000). Crop Rotation and Nitrogen Effects on Normalized Grain Yields in a Long-  
557 Term Study. *Agron. J.* 92, 938.

558 Wang, P., Marsh, E.L., Ainsworth, E.A., Leakey, A.D.B., Sheflin, A.M., and Schachtman, D.P.  
559 (2017). Shifts in microbial communities in soil, rhizosphere and roots of two major crop systems  
560 under elevated CO<sub>2</sub> and O<sub>3</sub>. *Sci. Rep.* 7, 15019.

561 Yadav, A.N., Kumar, V., Dhaliwal, H.S., Prasad, R., and Saxena, A.K. (2018). Microbiome in  
562 Crops: Diversity, Distribution, and Potential Role in Crop Improvement. In *Crop Improvement*  
563 *Through Microbial Biotechnology*, (Elsevier), pp. 305–332.

564 Yilmaz, P., Parfrey, L.W., Yarza, P., Gerken, J., Pruesse, E., Quast, C., Schweer, T., Peplies,  
565 J., Ludwig, W., and Glöckner, F.O. (2014). The SILVA and “All-species Living Tree Project  
566 (LTP)” taxonomic frameworks. *Nucleic Acids Res.* 42, D643–D648.

567 Zhu, S., Vivanco, J.M., and Manter, D.K. (2016). Nitrogen fertilizer rate affects root exudation,  
568 the rhizosphere microbiome and nitrogen-use-efficiency of maize. *Appl. Soil Ecol.* 107, 324–  
569 333.

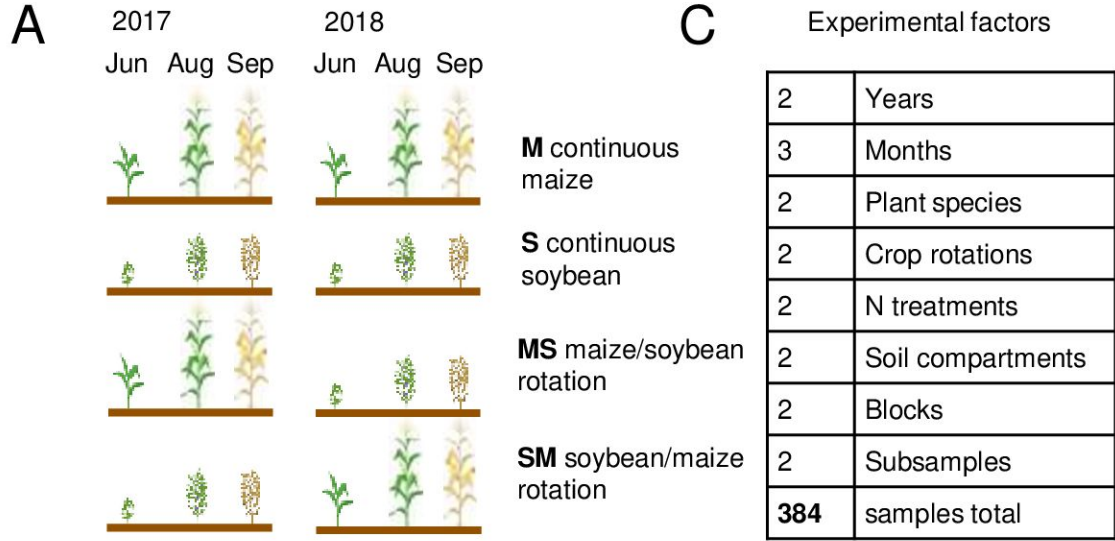

**C** Experimental factors

|            |                      |
|------------|----------------------|
| 2          | Years                |
| 3          | Months               |
| 2          | Plant species        |
| 2          | Crop rotations       |
| 2          | N treatments         |
| 2          | Soil compartments    |
| 2          | Blocks               |
| 2          | Subsamples           |
| <b>384</b> | <b>samples total</b> |

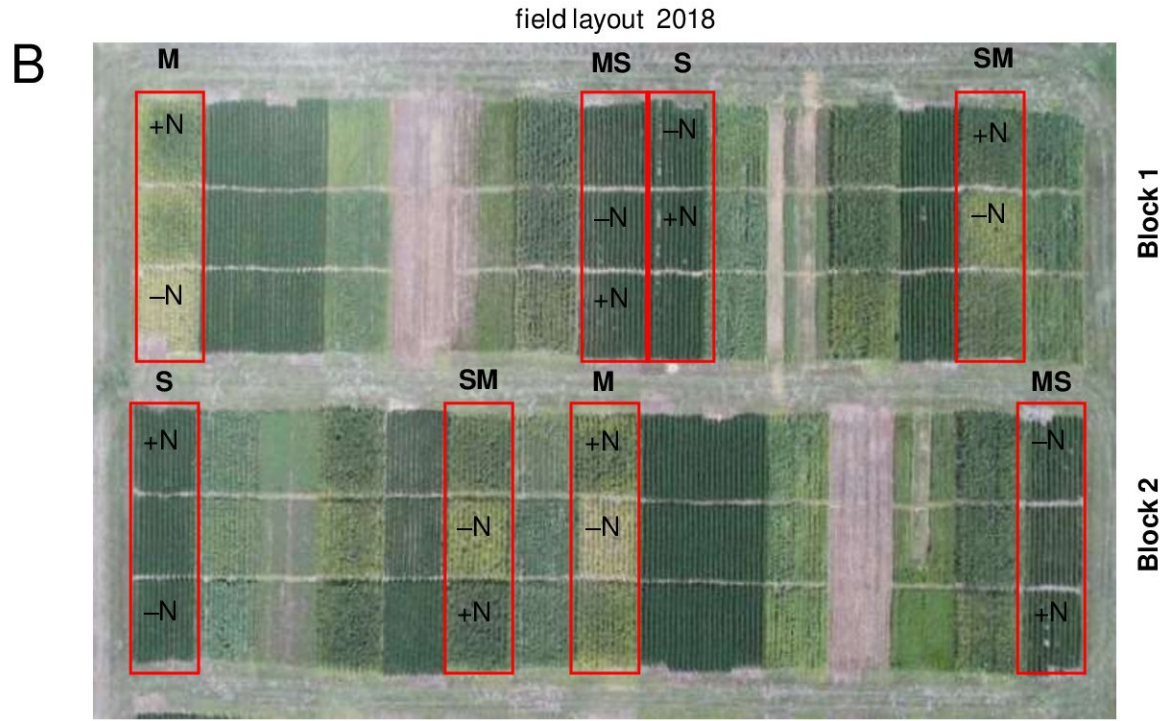

Fig. 2

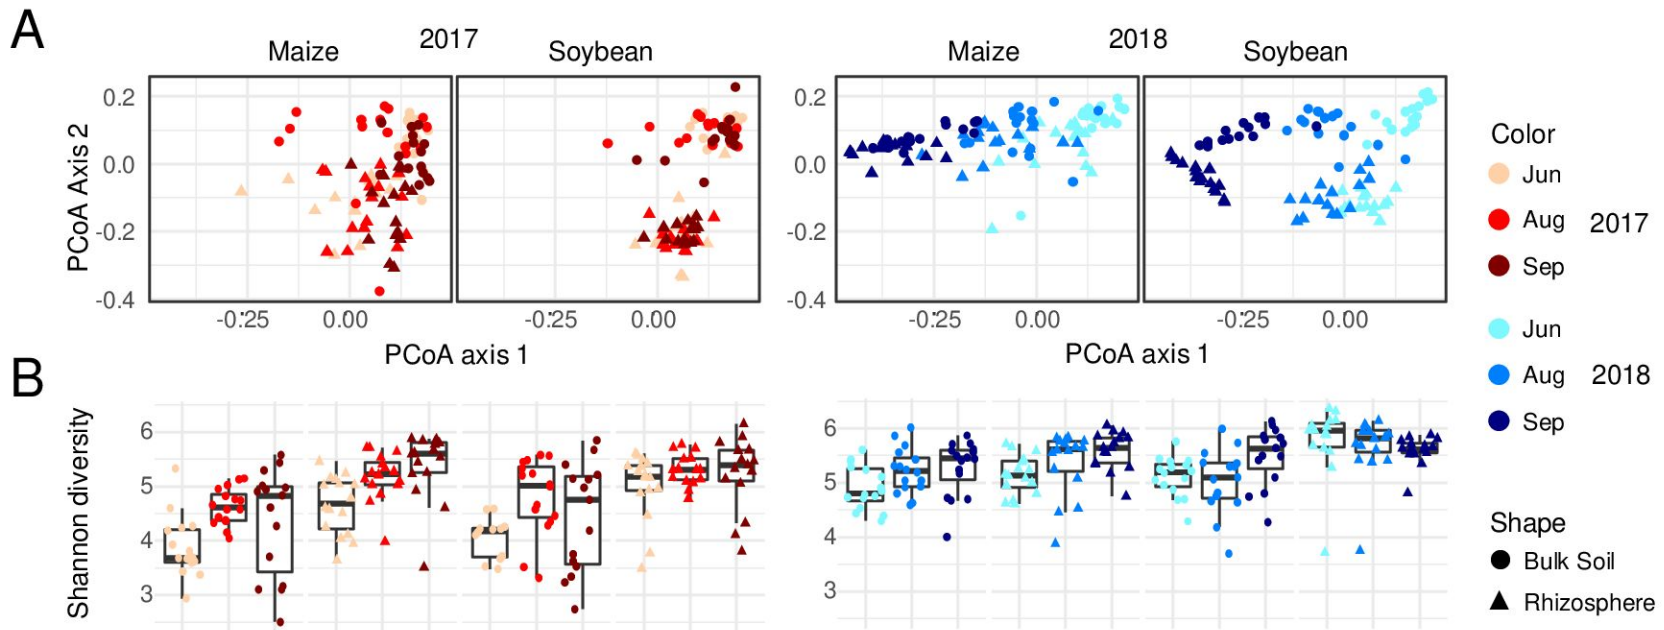

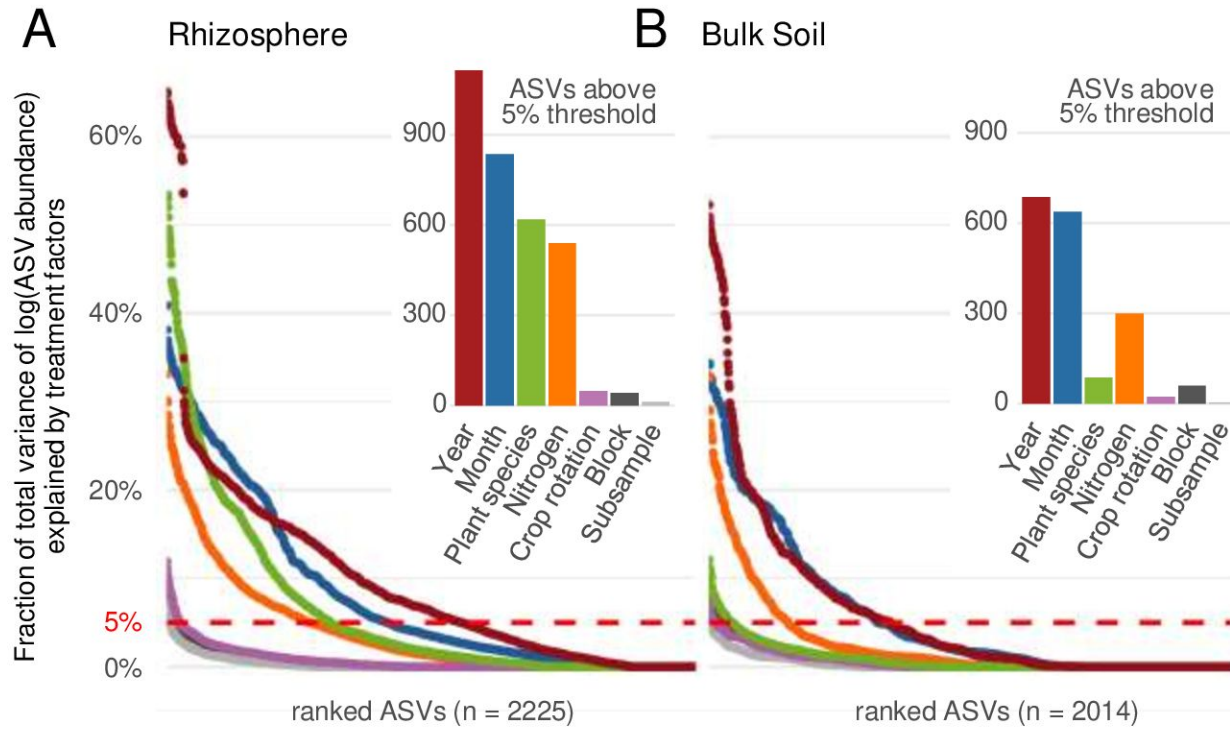

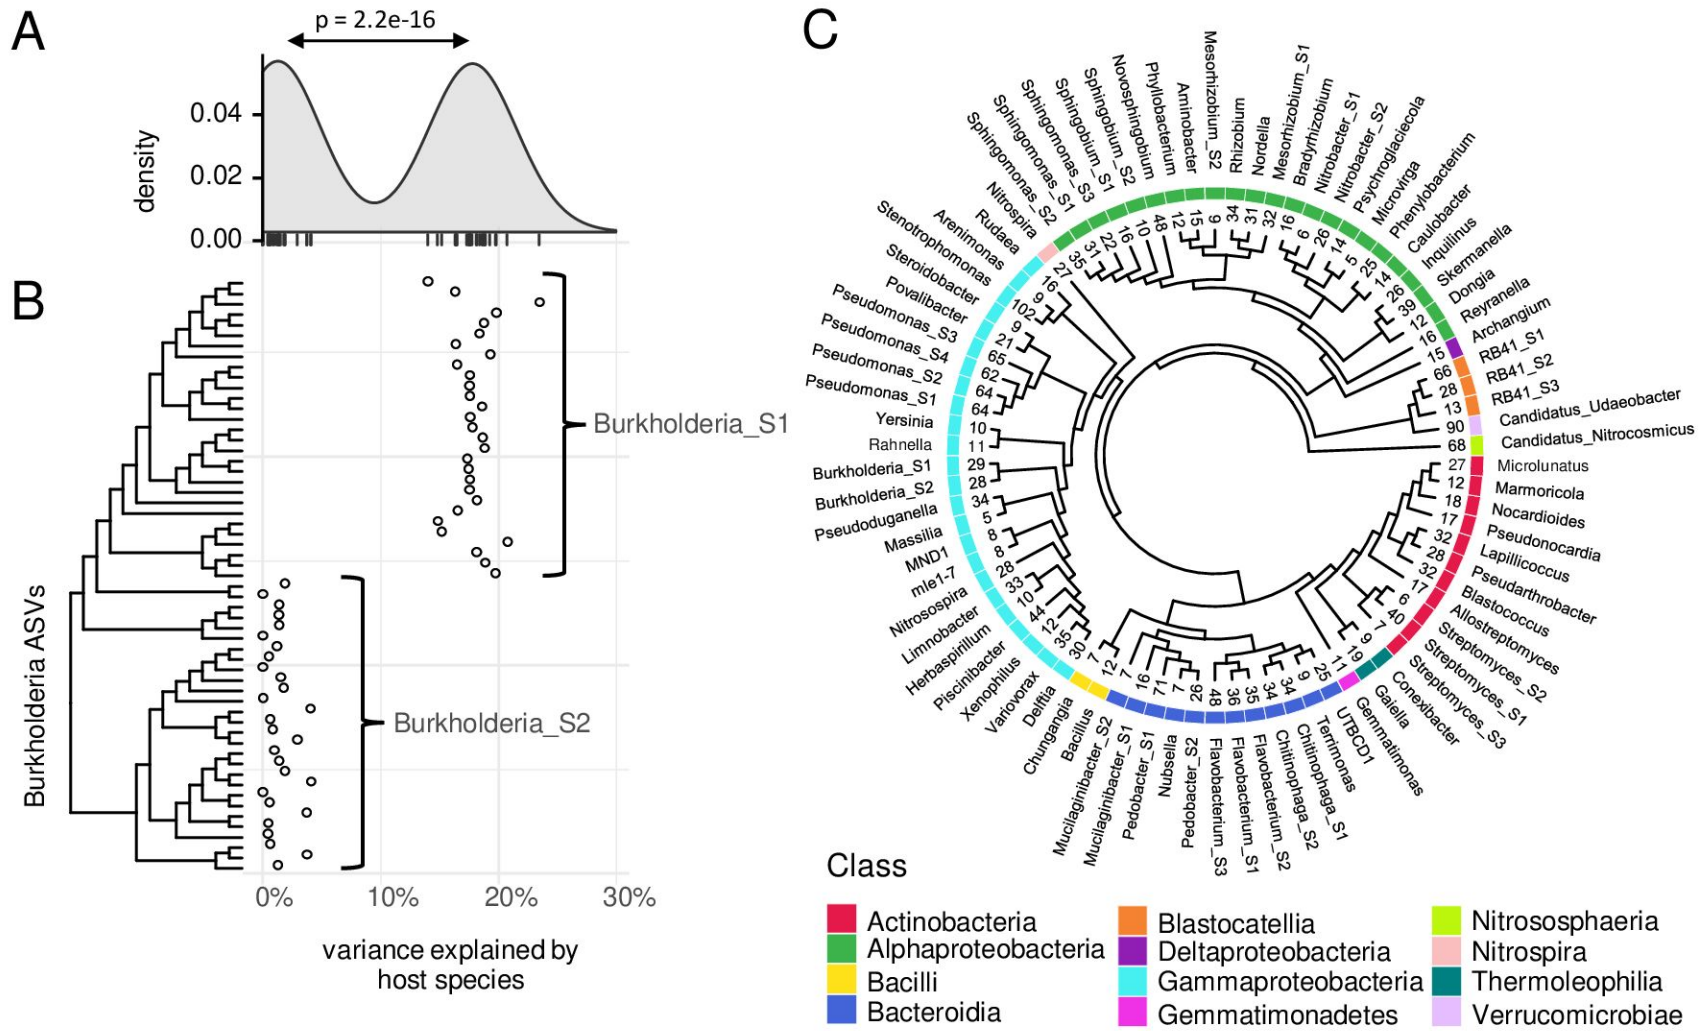

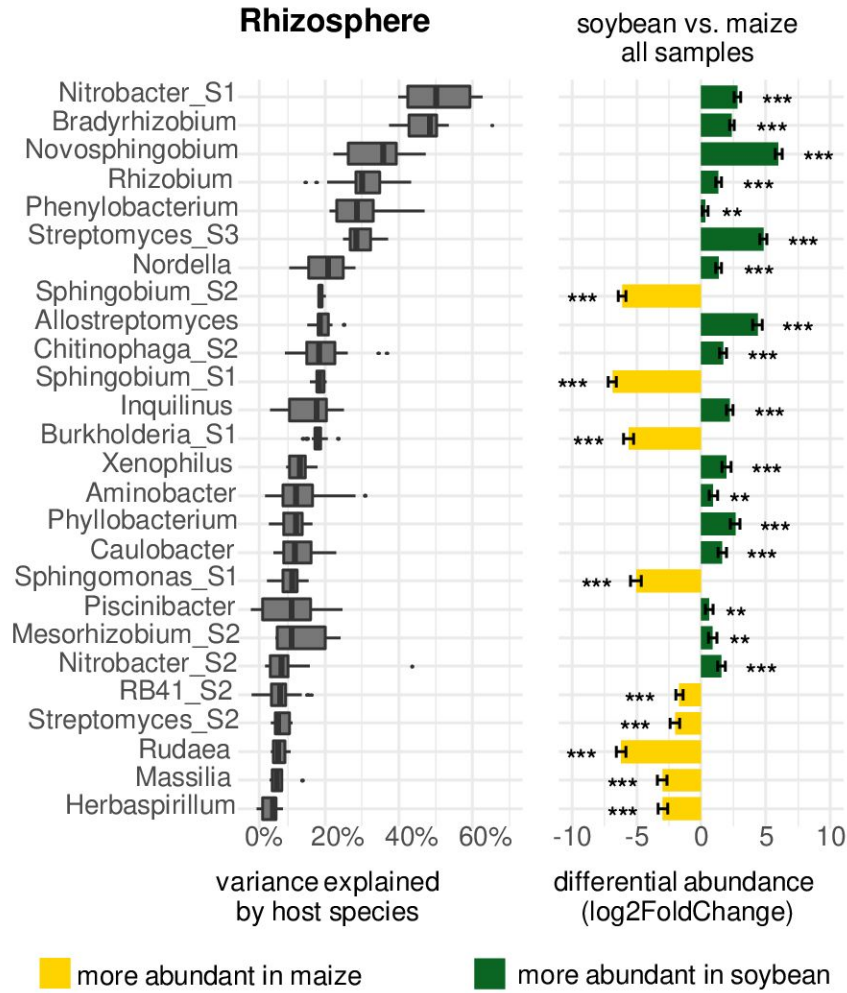

Fig. 6

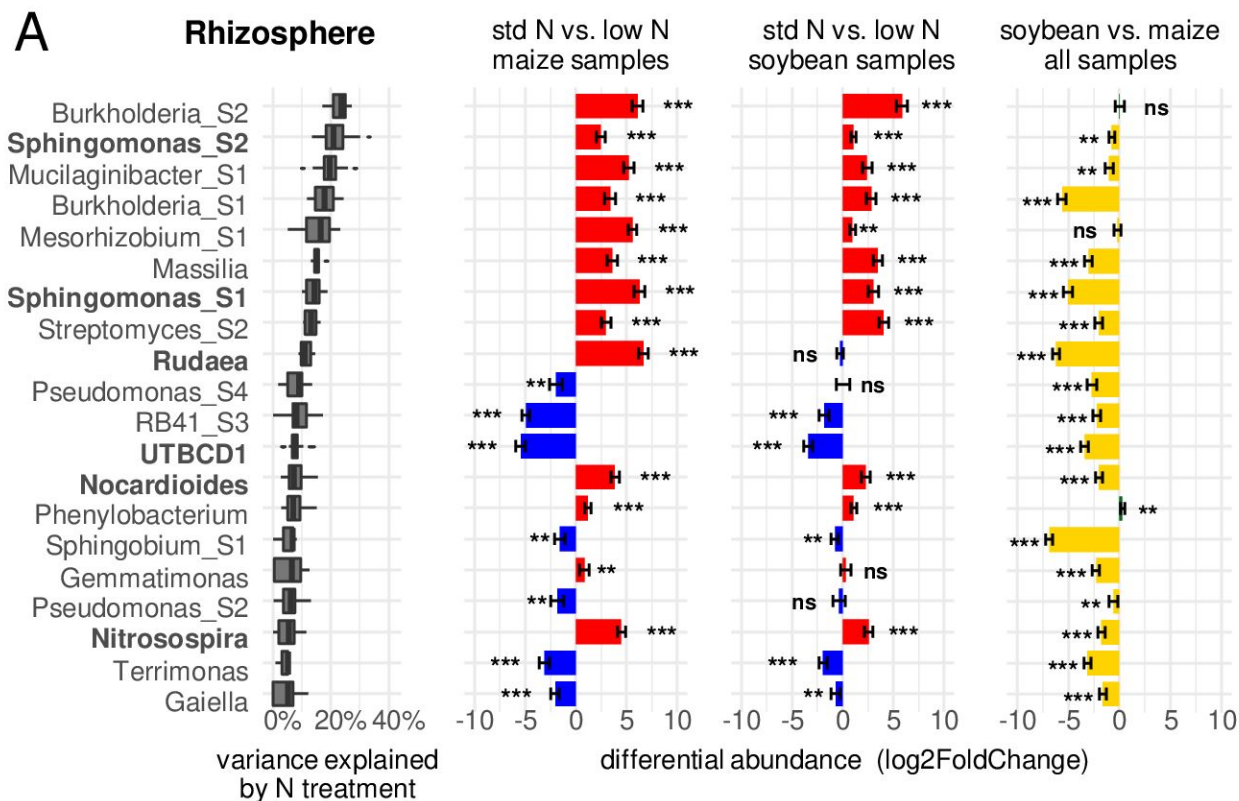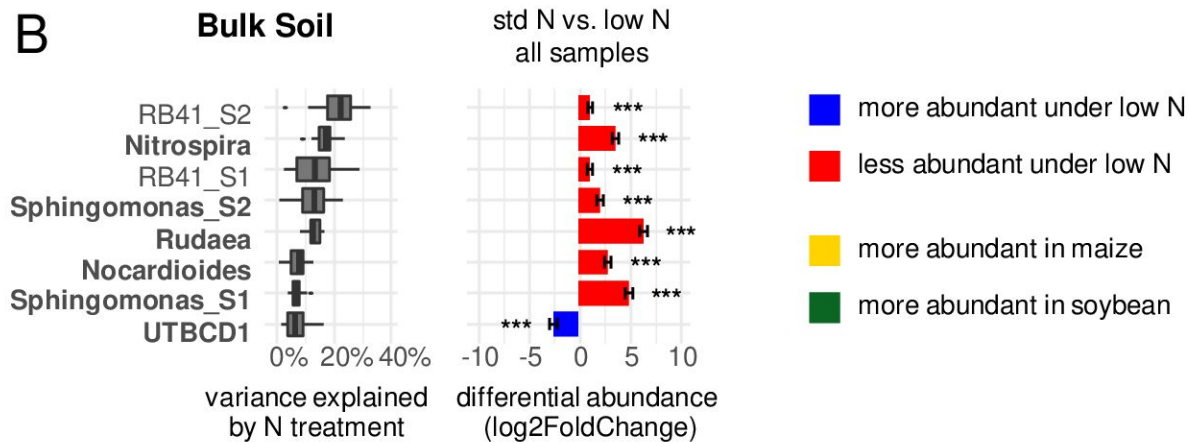

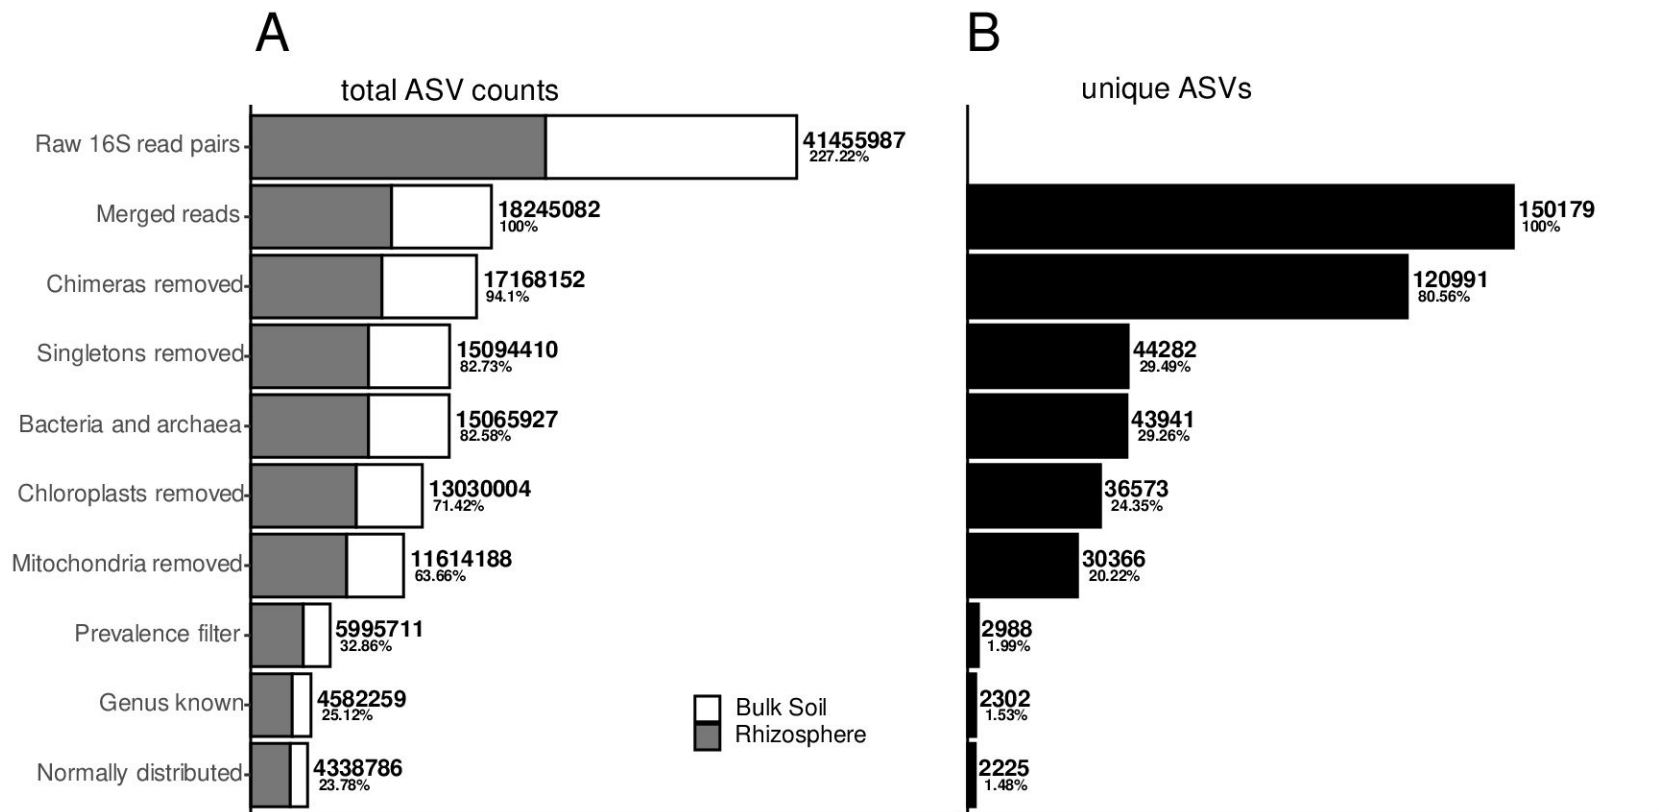



Fig. S2

**A** Abundance of taxonomic groups across 6 time points

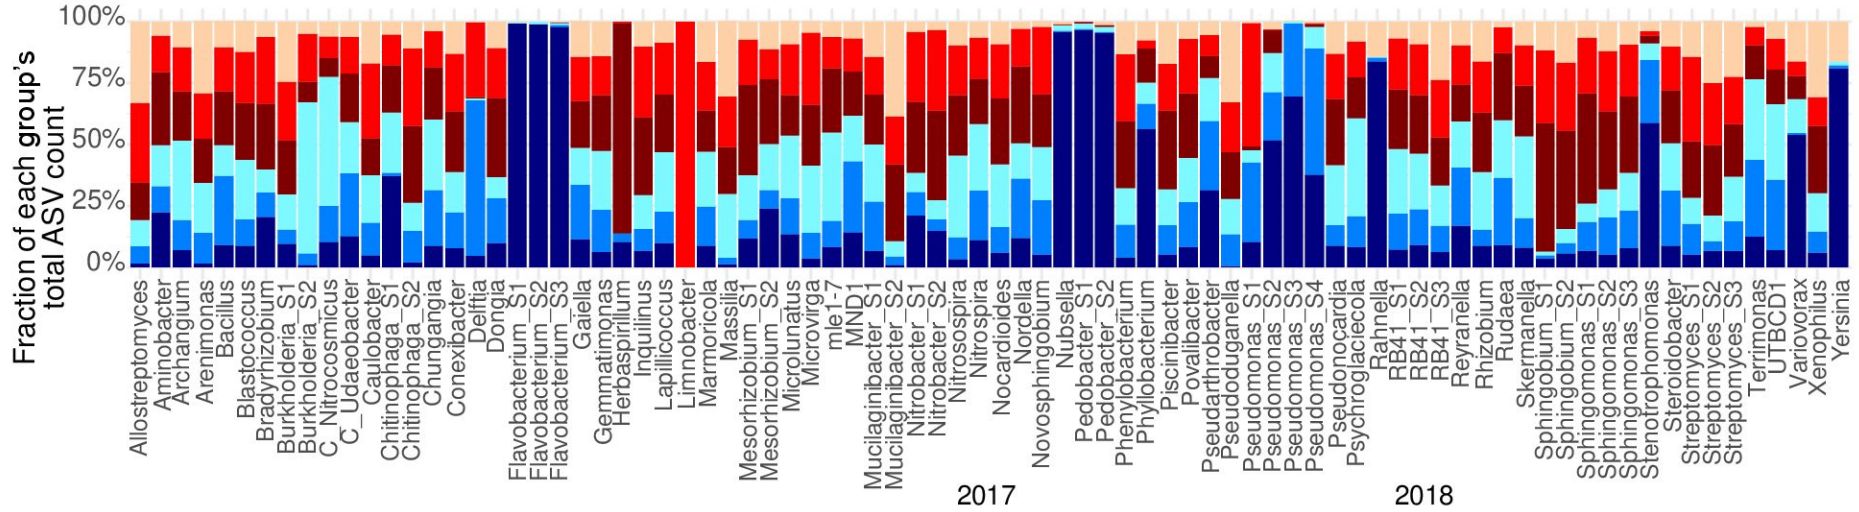

**B** Soil temperature and precipitation at field site

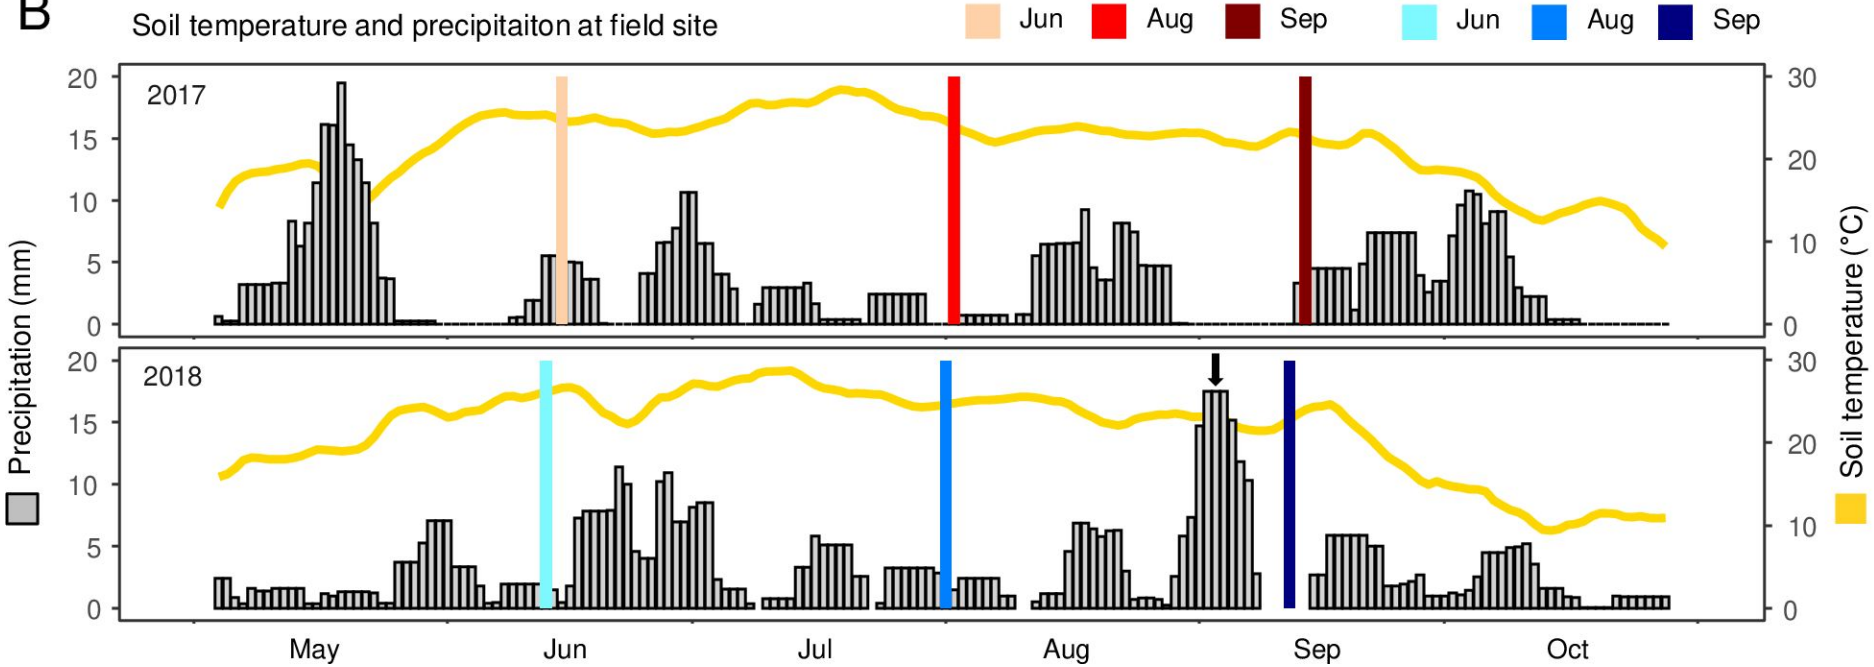

Fig. S3

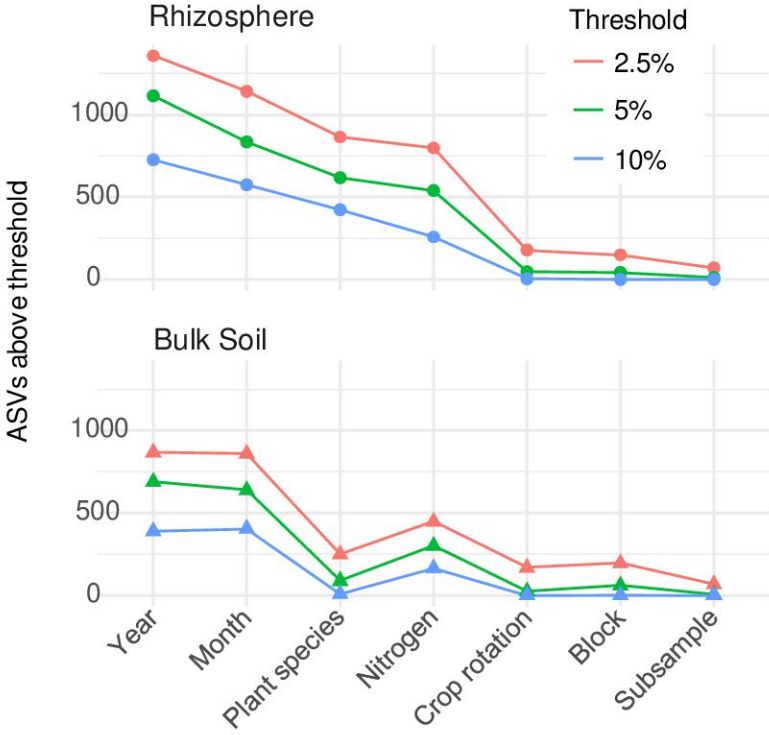

variance explained by host species

variance explained by N

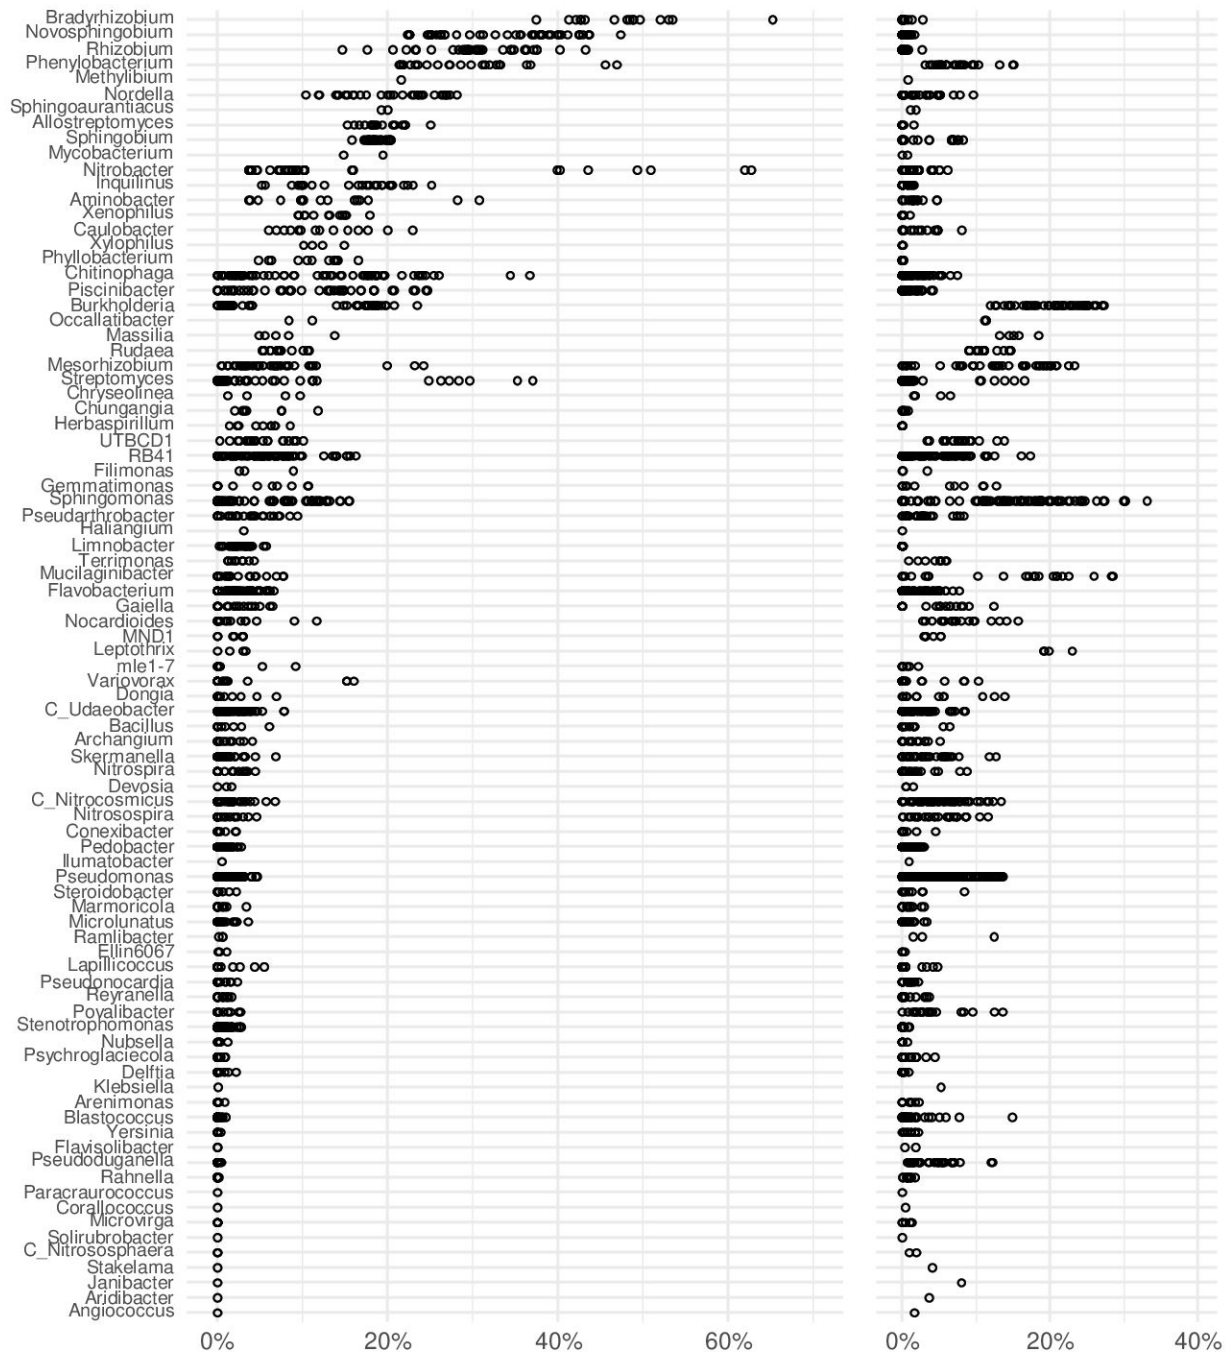

Fig. S4

Fig. S5

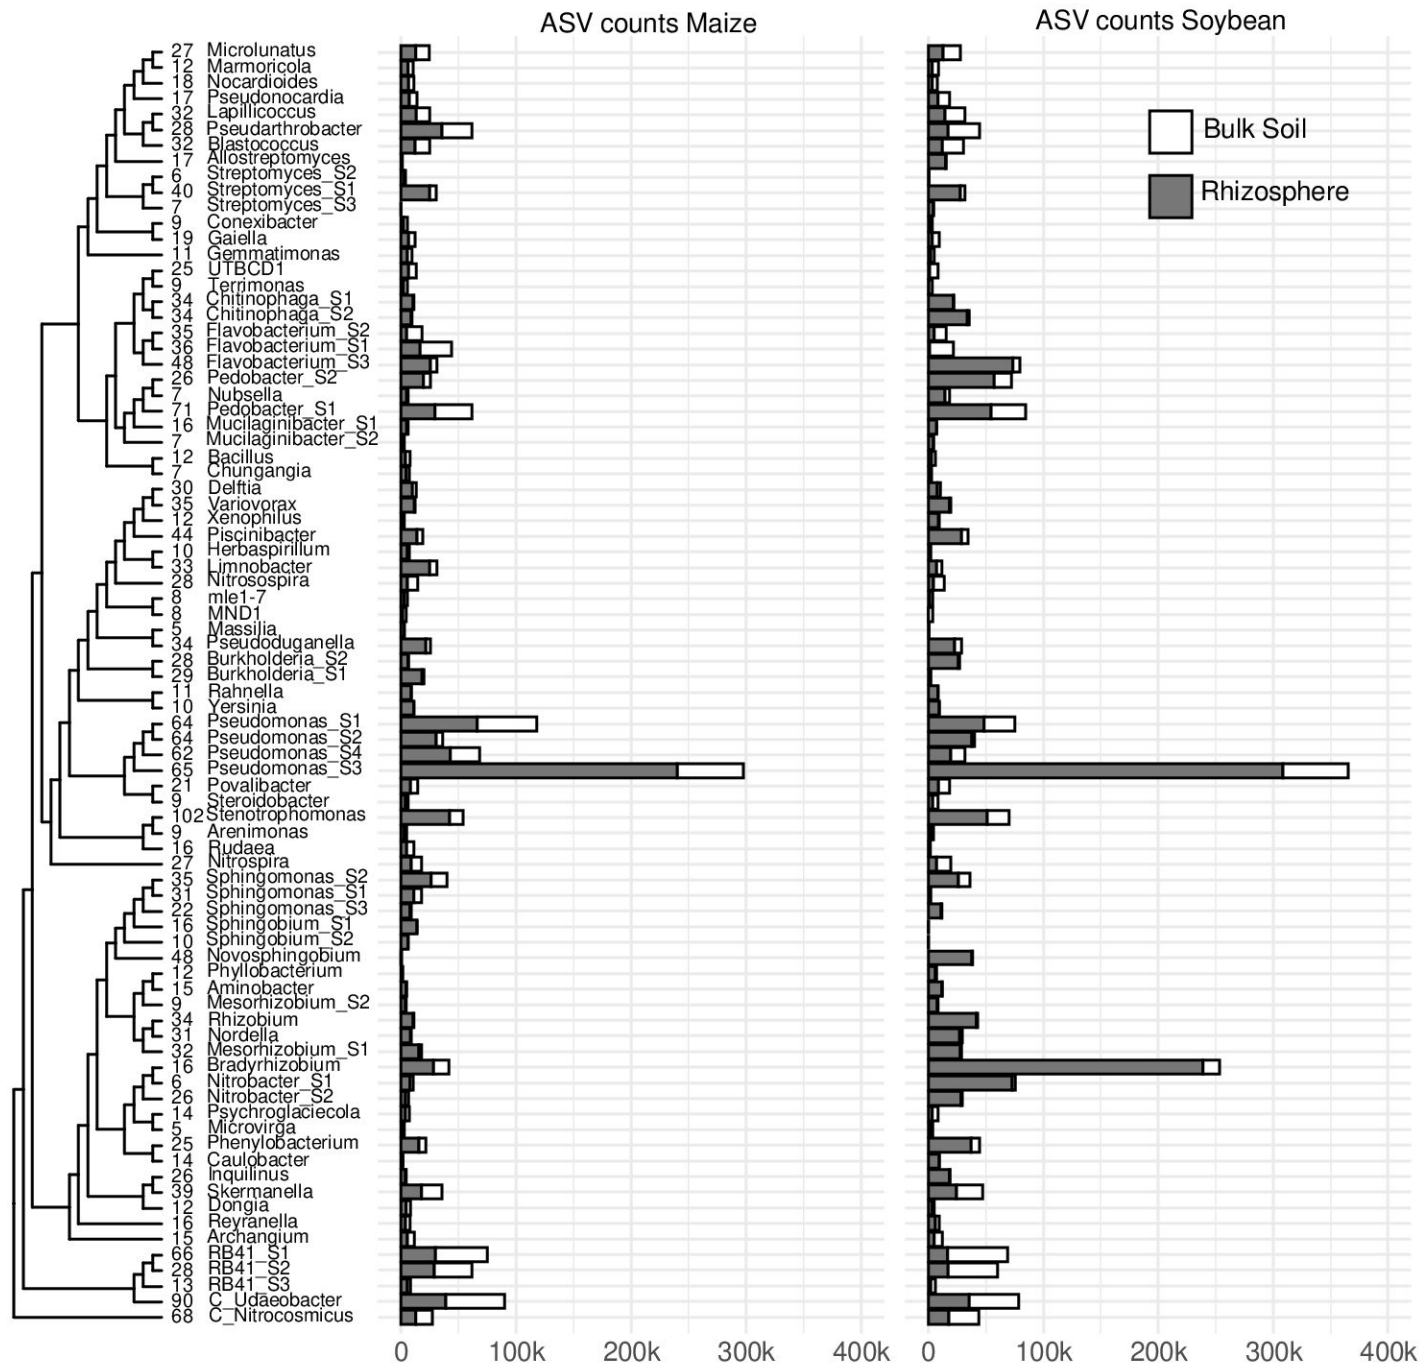

Fig. S6

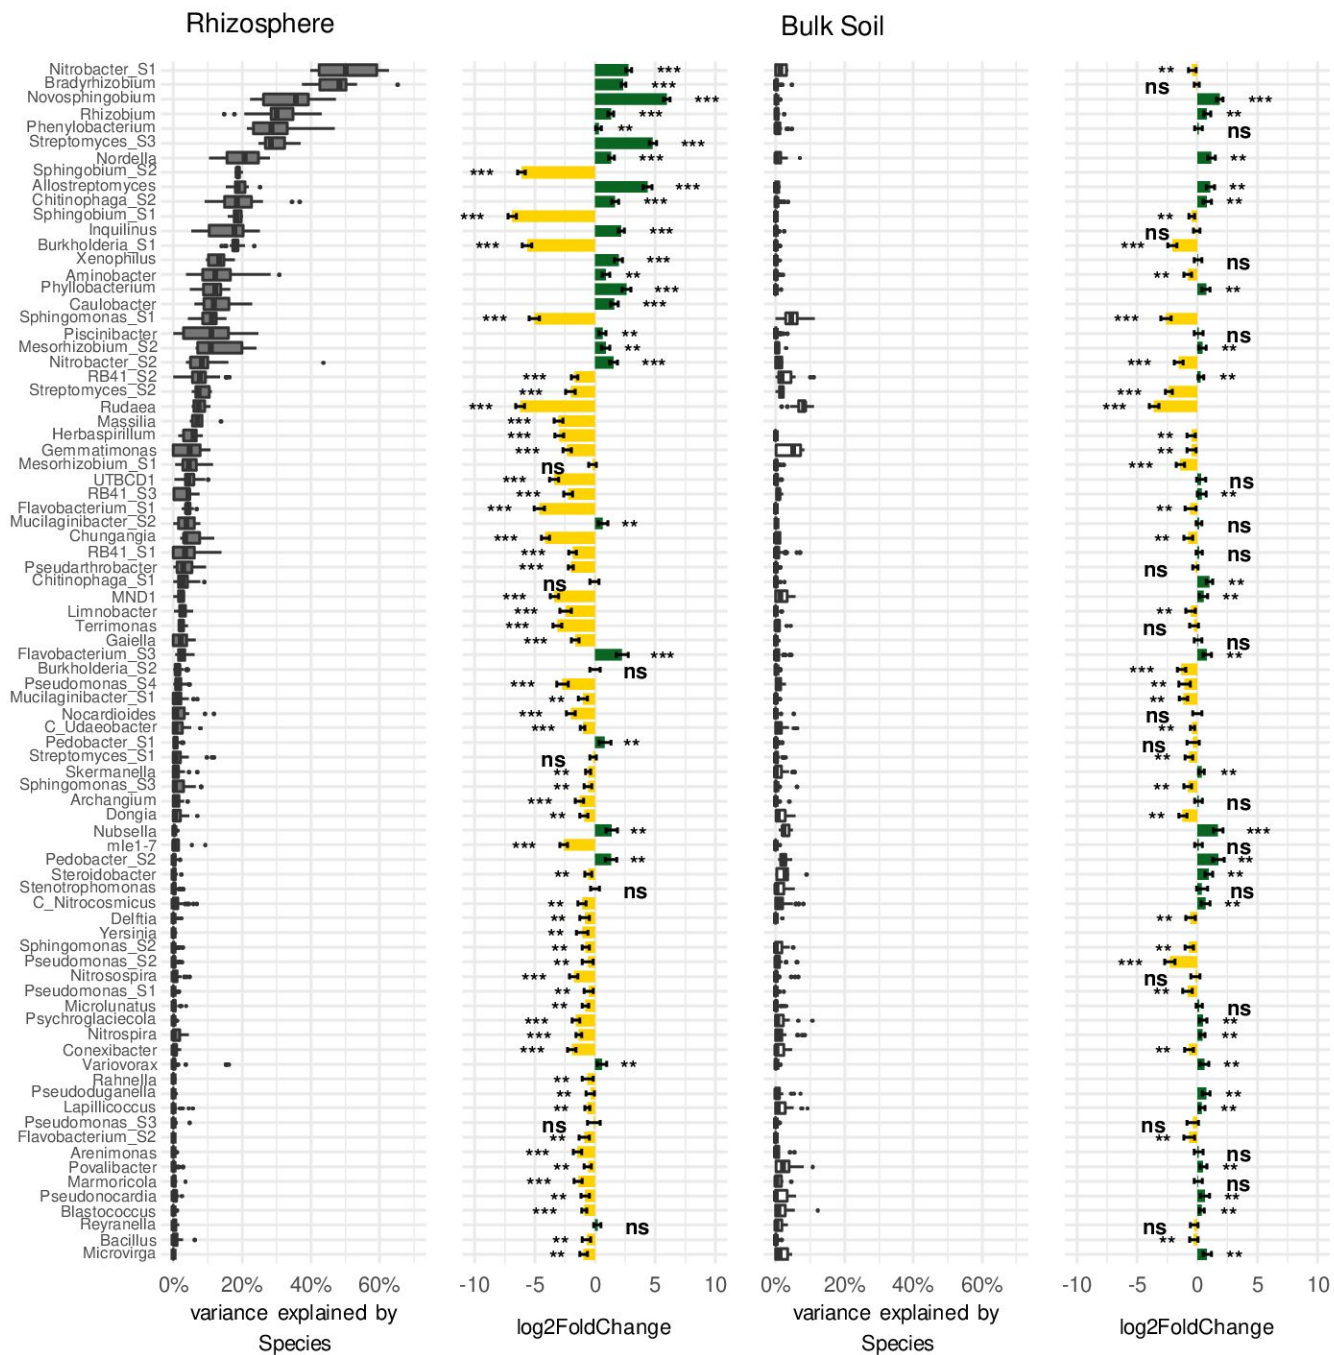

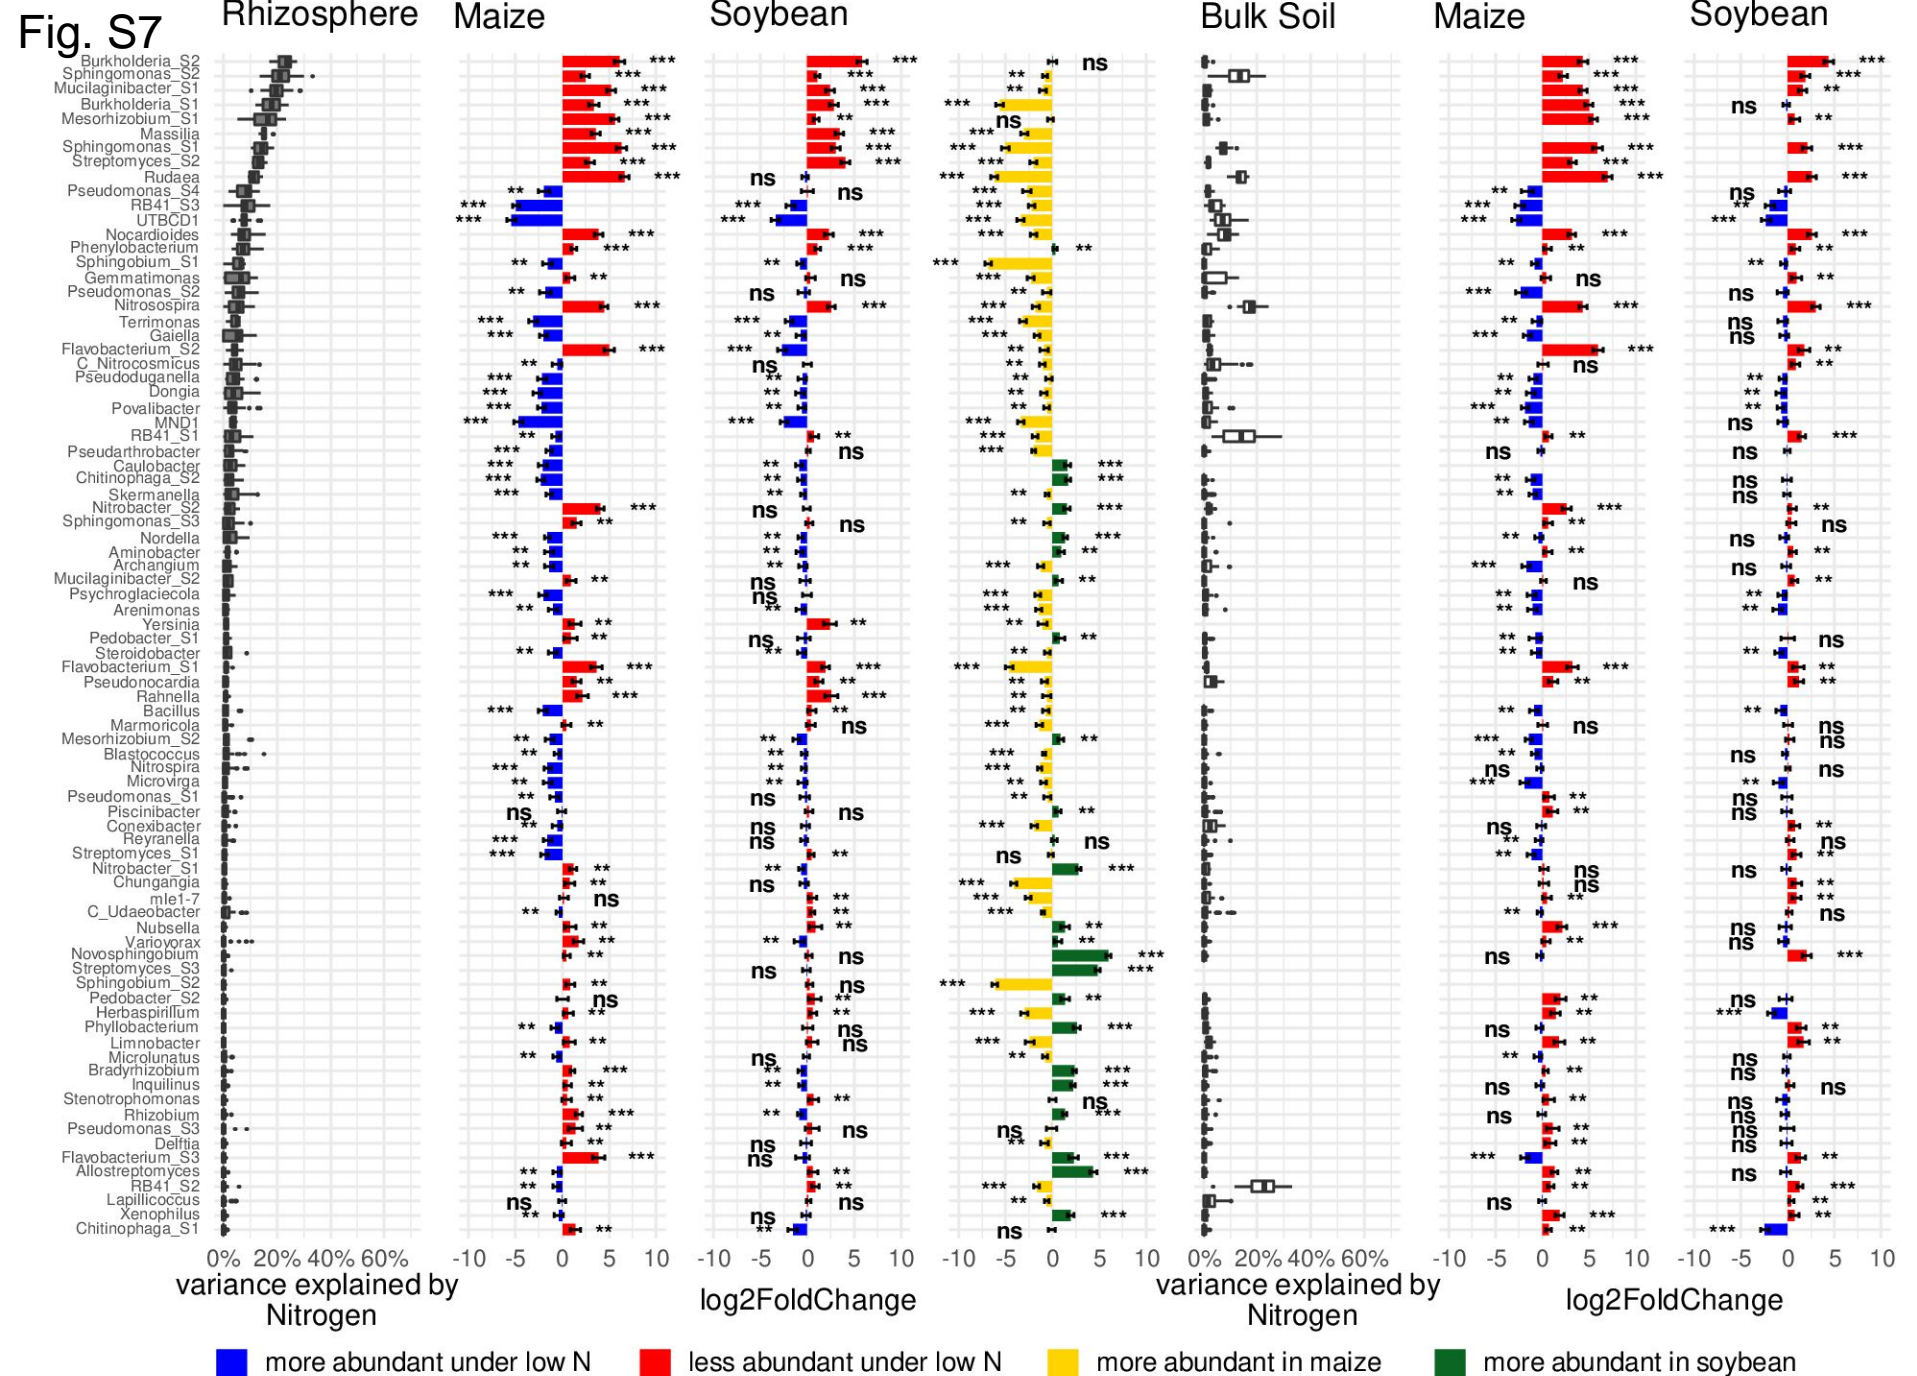

| Genus            | subgroups identified<br>by response to treatment | 97% OTUs generated<br>from ASVs |
|------------------|--------------------------------------------------|---------------------------------|
| Burkholderia     | 2                                                | 1*                              |
| Chitinophaga     | 2                                                | 3                               |
| Flavobacterium   | 3                                                | 4                               |
| Mesorhizobium    | 2                                                | 3                               |
| Mucilaginibacter | 2                                                | 2                               |
| Nitrobacter      | 2                                                | 1*                              |
| Pedobacter       | 2                                                | 2                               |
| Pseudomonas      | 4                                                | 3                               |
| RB41             | 3                                                | 7                               |
| Sphingobium      | 2                                                | 1*                              |
| Sphingomonas     | 3                                                | 4                               |
| Streptomyces     | 3                                                | 3                               |
